# Supplementary material for: High-biobased polymerizable deep eutectic solvents for sustainable DLP printing: assembly welding and reprintable printing
Source: Royal Society of Chemistry journal article supplement (doi:10.1039/d3gc02662k), 2023-11-03
Supplement: d3gc02662k1.xlsx [file d3gc02662k1.xlsx]

## Sheet: Sheet1
Line1		Line2		Line3
Stress1	Strain1	Stress2	Strain2	Stress3	Strain3
0.04809	0	0.00379	0	-0.00394	0
0.04918	0	0.00379	0	-0.00394	0
0.05027	7e-05	0.00455	2e-05	-0.00472	2e-05
0.05137	0.00022	0.00455	0.00018	-0.00472	0.00023
0.05301	0.00045	0.00682	0.00046	-0.00236	0.00058
0.06284	0.00067	0.025	0.00062	0.01969	0.0008
0.31421	0.00086	0.42197	0.00081	0.47244	0.00103
0.32678	0.00106	0.43636	0.00099	0.4874	0.00126
0.5459	0.00126	0.46364	0.00117	0.51496	0.0015
0.55574	0.00146	0.84091	0.00136	0.82047	0.00174
0.57213	0.00166	0.85303	0.00154	0.82283	0.00197
0.79071	0.00184	0.87348	0.00171	0.82677	0.00219
0.79508	0.00204	0.90076	0.0019	0.83307	0.00242
0.80383	0.00223	1.22576	0.00208	0.84173	0.00265
0.81421	0.00242	1.23182	0.00225	0.85039	0.00288
0.82459	0.00261	1.24167	0.00243	0.85984	0.00311
0.83552	0.0028	1.25455	0.00261	0.87008	0.00334
0.84536	0.00301	1.27045	0.00279	0.88268	0.00358
0.85628	0.0032	1.29015	0.00299	0.89685	0.00382
0.86831	0.0034	1.31288	0.00316	0.90945	0.00406
0.88251	0.0036	1.33864	0.00335	0.92362	0.00427
0.89891	0.00379	1.36591	0.00352	0.93858	0.0045
0.91694	0.00399	1.66288	0.0037	0.95591	0.00473
0.93716	0.00418	1.66742	0.00389	0.9748	0.00497
1.15519	0.00436	1.67651	0.00406	0.99449	0.00519
1.15847	0.00455	1.68864	0.00424	1.01654	0.00542
1.16503	0.00475	1.70379	0.00442	1.03937	0.00565
1.17541	0.00494	1.72045	0.00461	1.06378	0.00589
1.18798	0.00514	1.73258	0.00478	1.08661	0.00612
1.20383	0.00534	1.73939	0.00497	1.10945	0.00636
1.22131	0.00554	1.75	0.00515	1.13228	0.00659
1.24098	0.00574	1.76439	0.00534	1.15512	0.00682
1.45355	0.00593	1.78258	0.00551	1.18268	0.00706
1.45683	0.00612	1.80076	0.00569	1.52756	0.00728
1.46284	0.00632	1.81894	0.00587	1.53465	0.0075
1.47104	0.0065	1.83561	0.00605	1.54567	0.00773
1.48197	0.00669	1.85152	0.00622	1.55906	0.00796
1.49454	0.00689	1.86667	0.00641	1.57638	0.0082
1.50874	0.00709	1.8803	0.00659	1.59685	0.00843
1.52514	0.00729	1.89318	0.00677	1.62126	0.00867
1.54317	0.00749	1.90455	0.00696	1.64961	0.0089
1.56339	0.00768	1.91515	0.00715	1.96457	0.00914
1.77377	0.00788	1.925	0.00731	1.97008	0.00936
1.77705	0.00807	1.93409	0.0075	1.9811	0.0096
1.78251	0.00827	1.94242	0.00768	1.99606	0.00982
1.79071	0.00846	1.95	0.00785	2.01496	0.01005
1.80055	0.00864	1.95758	0.00804	2.03701	0.01027
1.81257	0.00884	1.96364	0.00821	2.06142	0.0105
1.82623	0.00903	1.9697	0.0084	2.08898	0.01074
1.84153	0.00923	1.97576	0.00858	2.39291	0.01098
1.85847	0.00943	1.98106	0.00876	2.39921	0.01122
1.87705	0.00963	1.98636	0.00895	2.40945	0.01145
1.89672	0.00982	1.99167	0.00913	2.42362	0.01168
2.10546	0.01002	1.99621	0.0093	2.44094	0.01191
2.1082	0.01021	2.00076	0.0095	2.46142	0.01214
2.11257	0.0104	2.00455	0.00967	2.48346	0.01237
2.11749	0.01059	2.00909	0.00984	2.50866	0.01259
2.12131	0.01078	2.01288	0.01002	2.53465	0.01282
2.12514	0.01098	2.01742	0.0102	2.56299	0.01305
2.13005	0.01117	2.02121	0.01038	2.59213	0.01329
2.13716	0.01137	2.025	0.01057	2.90394	0.01352
2.14645	0.01157	2.02879	0.01075	2.90866	0.01376
2.15847	0.01177	2.03258	0.01094	2.91732	0.01399
2.17213	0.01197	2.03561	0.01112	2.92992	0.01423
2.18743	0.01215	2.03939	0.0113	2.94646	0.01446
2.20382	0.01235	2.04242	0.01148	2.96457	0.01468
2.22076	0.01254	2.04621	0.01166	2.98583	0.01491
2.2388	0.01273	2.05076	0.01183	3.00787	0.01514
2.25738	0.01292	2.05606	0.01202	3.03307	0.01537
2.2765	0.01311	2.06212	0.01219	3.05984	0.0156
2.29563	0.01331	2.06742	0.01237	3.0874	0.01583
2.31585	0.01351	2.07273	0.01257	3.38661	0.01607
2.33552	0.01371	2.07803	0.01275	3.39134	0.01631
2.35519	0.01391	2.08333	0.01293	3.4	0.01655
2.37322	0.0141	2.08864	0.01311	3.41181	0.01676
2.38962	0.0143	2.09318	0.01328	3.42598	0.017
2.40546	0.01449	2.09773	0.01347	3.44252	0.01722
2.42022	0.01468	2.10152	0.01365	3.46142	0.01746
2.43443	0.01487	2.10606	0.01382	3.48189	0.01768
2.44754	0.01506	2.10985	0.01401	3.50472	0.01791
2.46066	0.01526	2.11439	0.01418	3.52835	0.01815
2.47268	0.01545	2.11818	0.01436	3.55433	0.01838
2.4847	0.01565	2.12197	0.01455	3.58189	0.01862
2.49508	0.01585	2.12727	0.01473	3.61102	0.01885
2.50546	0.01605	2.13712	0.01492	3.91102	0.01908
2.51475	0.01625	2.15455	0.0151	3.91496	0.01932
2.5235	0.01643	2.1803	0.01528	3.92205	0.01955
2.53169	0.01663	2.51061	0.01546	3.93228	0.01977
2.5388	0.01682	2.51894	0.01563	3.94488	0.01999
2.54536	0.01701	2.53333	0.01581	3.95906	0.02022
2.55191	0.0172	2.55303	0.016	3.97638	0.02045
2.55738	0.01739	2.57651	0.01617	3.99528	0.02069
2.56339	0.01759	2.60227	0.01635	4.01732	0.02092
2.56831	0.01779	2.63106	0.01655	4.04016	0.02116
2.57268	0.01799	2.9303	0.01672	4.06535	0.0214
2.57705	0.01819	2.93333	0.01692	4.09213	0.02163
2.58033	0.01838	2.94015	0.01708	4.11969	0.02186
2.58361	0.01857	2.94848	0.01726	4.14803	0.02209
2.58634	0.01877	2.95909	0.01745	4.17717	0.02232
2.58852	0.01896	2.97273	0.01762	4.47402	0.02254
2.59071	0.01915	2.98788	0.0178	4.47717	0.02277
2.59235	0.01934	3.00606	0.01797	4.48268	0.023
2.59344	0.01954	3.025	0.01817	4.49213	0.02324
2.59508	0.01974	3.04697	0.01835	4.50472	0.02348
2.59672	0.01993	3.07121	0.01854	4.51969	0.02371
2.59891	0.02013	3.09697	0.01871	4.5378	0.02394
2.60055	0.02033	3.12348	0.01889	4.55669	0.02417
2.60273	0.02052	3.15227	0.01908	4.57795	0.0244
2.60546	0.02072	3.43939	0.01926	4.6	0.02463
2.60765	0.0209	3.44318	0.01944	4.62283	0.02486
2.61038	0.0211	3.45	0.01961	4.64646	0.02508
2.61421	0.02129	3.45909	0.01979	4.67087	0.02531
2.61803	0.02148	3.47121	0.01996	4.69685	0.02555
2.62186	0.02168	3.48561	0.02016	4.72362	0.02578
2.62568	0.02188	3.50227	0.02033	4.75197	0.02602
2.62951	0.02208	3.52121	0.02053	4.7811	0.02625
2.63279	0.02228	3.54242	0.02071	5.08189	0.02649
2.63552	0.02247	3.56439	0.02088	5.08504	0.02672
2.6388	0.02265	3.58788	0.02107	5.09213	0.02695
2.64153	0.02285	3.61212	0.02124	5.10157	0.02717
2.64426	0.02304	3.63712	0.02142	5.11339	0.0274
2.64699	0.02324	3.66288	0.0216	5.12756	0.02763
2.64973	0.02343	3.68864	0.02178	5.14331	0.02786
2.65301	0.02362	3.71515	0.02197	5.16063	0.02809
2.65628	0.02382	3.74318	0.02215	5.18032	0.02833
2.66011	0.02402	4.03258	0.02233	5.20236	0.02857
2.66612	0.02422	4.03636	0.02252	5.2252	0.02881
2.67869	0.02441	4.04318	0.02269	5.24961	0.02903
2.69836	0.02461	4.05227	0.02287	5.2748	0.02925
2.9541	0.0248	4.06364	0.02306	5.3	0.02949
2.96066	0.02499	4.07727	0.02323	5.32677	0.02972
2.97158	0.02518	4.09242	0.02341	5.35354	0.02994
2.98579	0.02537	4.10909	0.02359	5.3811	0.03017
3.00164	0.02557	4.12727	0.02377	5.40945	0.0304
3.01967	0.02576	4.14697	0.02395	5.4378	0.03064
3.0388	0.02596	4.16818	0.02414	5.73386	0.03088
3.05902	0.02616	4.19091	0.02432	5.7378	0.03111
3.26776	0.02636	4.21439	0.02451	5.74488	0.03135
3.27049	0.02655	4.23939	0.02469	5.75433	0.03158
3.27596	0.02675	4.26515	0.02486	5.76614	0.03181
3.28361	0.02694	4.29167	0.02505	5.78032	0.03203
3.29235	0.02713	4.31818	0.02522	5.79606	0.03226
3.30328	0.02732	4.3447	0.02539	5.81339	0.03248
3.3153	0.02751	4.37197	0.02558	5.8315	0.03272
3.32896	0.0277	4.4	0.02576	5.85118	0.03295
3.34372	0.0279	4.42803	0.02594	5.87323	0.03319
3.36011	0.0281	4.71591	0.02613	5.89685	0.03342
3.37869	0.0283	4.71894	0.02631	5.92126	0.03366
3.39781	0.0285	4.72576	0.0265	5.94724	0.03389
3.41803	0.02869	4.73485	0.02667	5.9748	0.03412
3.62514	0.02889	4.74621	0.02685	6.00236	0.03435
3.62732	0.02908	4.75909	0.02703	6.02992	0.03458
3.63224	0.02927	4.77348	0.02721	6.05827	0.0348
3.6388	0.02946	4.78939	0.02738	6.08661	0.03503
3.64699	0.02965	4.80758	0.02757	6.11417	0.03526
3.65683	0.02984	4.82576	0.02775	6.14331	0.0355
3.66831	0.03004	4.84621	0.02793	6.44016	0.03574
3.68142	0.03024	4.86818	0.02812	6.44409	0.03598
3.69617	0.03044	4.89091	0.0283	6.45118	0.0362
3.71257	0.03064	4.91515	0.02849	6.46063	0.03644
3.72951	0.03084	4.94015	0.02866	6.47244	0.03666
3.74809	0.03103	4.96515	0.02884	6.48583	0.0369
3.76667	0.03122	4.99167	0.02901	6.50157	0.03713
3.78579	0.03141	5.01742	0.0292	6.51811	0.03735
3.80546	0.0316	5.04394	0.02937	6.53622	0.03758
3.82514	0.0318	5.07045	0.02956	6.55591	0.03781
3.84536	0.03199	5.09697	0.02974	6.57638	0.03804
4.05355	0.03218	5.125	0.02992	6.59843	0.03828
4.05628	0.03238	5.15303	0.03011	6.62205	0.03851
4.0612	0.03258	5.18182	0.03029	6.64646	0.03875
4.06885	0.03279	5.4697	0.03048	6.67244	0.03898
4.07869	0.03297	5.47273	0.03065	6.69921	0.03921
4.08962	0.03316	5.47803	0.03083	6.72598	0.03944
4.10109	0.03335	5.48636	0.031	6.75354	0.03967
4.11421	0.03355	5.49545	0.03119	6.7811	0.03989
4.12842	0.03374	5.50682	0.03136	6.80945	0.04012
4.14317	0.03393	5.5197	0.03154	6.8378	0.04035
4.15956	0.03413	5.53485	0.03173	6.86693	0.04059
4.1765	0.03433	5.55151	0.03191	7.16378	0.04083
4.19508	0.03452	5.57045	0.0321	7.16693	0.04106
4.21475	0.03472	5.59091	0.03228	7.17402	0.0413
4.23497	0.03492	5.61212	0.03246	7.18425	0.04152
4.44262	0.03511	5.63409	0.03264	7.19606	0.04175
4.44481	0.03531	5.65606	0.03282	7.20945	0.04198
4.44973	0.03549	5.67955	0.03301	7.22441	0.04221
4.45628	0.03568	5.70303	0.03318	7.24173	0.04244
4.46393	0.03588	5.72651	0.03336	7.25984	0.04266
4.47377	0.03607	5.75076	0.03353	7.27874	0.0429
4.48525	0.03627	5.77576	0.03372	7.29921	0.04314
4.49836	0.03647	5.80152	0.0339	7.32205	0.04337
4.51311	0.03667	5.82727	0.03409	7.34567	0.04361
4.52896	0.03686	5.85455	0.03427	7.37087	0.04384
4.5459	0.03706	5.88182	0.03445	7.39685	0.04407
4.56393	0.03725	5.90909	0.03463	7.42362	0.0443
4.58197	0.03745	5.93712	0.0348	7.45039	0.04452
4.60055	0.03764	5.96439	0.03498	7.47795	0.04475
4.61967	0.03782	5.99167	0.03517	7.50472	0.04498
4.6388	0.03802	6.01894	0.03534	7.5315	0.04521
4.65902	0.03821	6.04621	0.03552	7.55984	0.04545
4.67923	0.03841	6.07424	0.03571	7.58898	0.04568
4.89071	0.03861	6.10227	0.03589	7.88898	0.04592
4.89344	0.03881	6.39091	0.03608	7.89213	0.04616
4.89891	0.039	6.3947	0.03626	7.89921	0.04639
4.90656	0.0392	6.4	0.03643	7.90866	0.04661
4.91585	0.03939	6.40833	0.03662	7.9189	0.04684
4.92678	0.03959	6.41742	0.0368	7.93228	0.04707
4.9388	0.03978	6.42955	0.03697	7.94646	0.04729
4.95246	0.03996	6.44242	0.03716	7.96299	0.04752
4.96667	0.04016	6.45758	0.03733	7.98031	0.04776
4.98197	0.04035	6.47348	0.03751	7.99921	0.04799
4.99836	0.04055	6.49167	0.0377	8.02047	0.04823
5.01585	0.04075	6.51136	0.03788	8.04331	0.04847
5.03443	0.04095	6.53182	0.03807	8.06772	0.0487
5.0541	0.04114	6.55379	0.03825	8.09213	0.04893
5.07377	0.04134	6.57576	0.03843	8.11654	0.04916
5.27923	0.04153	6.59848	0.03861	8.14252	0.04939
5.28142	0.04172	6.62197	0.03878	8.1685	0.04961
5.28579	0.04191	6.6447	0.03896	8.19449	0.04984
5.2918	0.04211	6.66818	0.03915	8.22126	0.05007
5.29945	0.0423	6.69242	0.03932	8.24803	0.0503
5.30929	0.04249	6.71667	0.0395	8.27559	0.05054
5.32022	0.04269	6.74242	0.03969	8.30394	0.05077
5.33279	0.04289	6.76818	0.03987	8.33307	0.05101
5.34699	0.04309	6.7947	0.04005	8.63622	0.05125
5.36284	0.04329	6.82121	0.04024	8.63937	0.05148
5.37978	0.04347	6.84848	0.04041	8.64567	0.0517
5.39617	0.04367	6.875	0.0406	8.65433	0.05193
5.41366	0.04386	6.90227	0.04078	8.66457	0.05216
5.43169	0.04405	6.92879	0.04095	8.67717	0.05239
5.45027	0.04424	6.9553	0.04112	8.69134	0.05262
5.46885	0.04444	6.98182	0.04131	8.70709	0.05285
5.48852	0.04464	7.00909	0.04149	8.7252	0.05308
5.50929	0.04483	7.03712	0.04169	8.74488	0.05332
5.7235	0.04503	7.06515	0.04186	8.76614	0.05356
5.72623	0.04523	7.09394	0.04204	8.78898	0.05379
5.73115	0.04542	7.12197	0.04223	8.8126	0.05401
5.73825	0.04562	7.15	0.0424	8.83622	0.05425
5.74645	0.04581	7.17803	0.04258	8.86142	0.05448
5.75683	0.046	7.20606	0.04276	8.88661	0.0547
5.76776	0.04618	7.23333	0.04294	8.91181	0.05493
5.77978	0.04638	7.26061	0.04313	8.9378	0.05516
5.79344	0.04658	7.28864	0.04331	8.96457	0.0554
5.80765	0.04678	7.31667	0.04348	8.99134	0.05563
5.8235	0.04697	7.3447	0.04367	9.02047	0.05587
5.84098	0.04717	7.37348	0.04385	9.04882	0.0561
5.85902	0.04737	7.65909	0.04403	9.07874	0.05633
5.87814	0.04756	7.66136	0.04422	9.37638	0.05657
5.89781	0.04776	7.66742	0.04439	9.37953	0.05679
5.91749	0.04795	7.675	0.04457	9.38504	0.05701
5.9377	0.04814	7.68485	0.04475	9.39291	0.05724
5.95792	0.04833	7.69621	0.04493	9.40236	0.05747
5.97814	0.04852	7.70909	0.0451	9.41496	0.05771
6.18634	0.04872	7.72348	0.04529	9.42913	0.05794
6.18907	0.04892	7.73864	0.04547	9.44646	0.05818
6.19454	0.04912	7.75606	0.04567	9.46457	0.05842
6.20219	0.04931	7.775	0.04585	9.48504	0.05865
6.21147	0.04951	7.7947	0.04602	9.50709	0.05888
6.2224	0.0497	7.81591	0.0462	9.52992	0.05911
6.23443	0.0499	7.83636	0.04638	9.55354	0.05934
6.24809	0.05009	7.85758	0.04656	9.57795	0.05956
6.26284	0.05028	7.87955	0.04674	9.60236	0.05978
6.27814	0.05047	7.90152	0.04692	9.62677	0.06001
6.29399	0.05066	7.92424	0.04709	9.65276	0.06025
6.31093	0.05086	7.94773	0.04729	9.67953	0.06049
6.32841	0.05106	7.97121	0.04747	9.70709	0.06073
6.34754	0.05126	7.99697	0.04766	9.73622	0.06096
6.36776	0.05145	8.02197	0.04784	9.76457	0.06119
6.57322	0.05165	8.04848	0.04801	9.79291	0.06142
6.57541	0.05185	8.075	0.0482	9.82205	0.06166
6.58033	0.05204	8.10151	0.04837	9.85118	0.06188
6.58688	0.05223	8.12727	0.04854	9.8811	0.0621
6.59453	0.05242	8.15303	0.04873	9.91024	0.06233
6.60437	0.05261	8.17879	0.04891	9.93858	0.06256
6.6153	0.0528	8.20455	0.04909	9.96772	0.0628
6.62787	0.053	8.23182	0.04928	10.2638	0.06303
6.64208	0.0532	8.25833	0.04946	10.2669	0.06327
6.65738	0.0534	8.28561	0.04965	10.274	0.06351
6.67377	0.0536	8.31364	0.04983	10.2843	0.06374
6.69126	0.05379	8.34091	0.05	10.2968	0.06397
6.70984	0.05398	8.36818	0.05019	10.311	0.06419
6.72787	0.05417	8.39545	0.05036	10.3268	0.06442
6.74699	0.05437	8.42273	0.05054	10.3433	0.06465
6.76667	0.05455	8.45	0.05072	10.3622	0.06488
6.78634	0.05475	8.47651	0.0509	10.3819	0.06511
6.8071	0.05494	8.50303	0.05108	10.4024	0.06534
7.01585	0.05514	8.5303	0.05127	10.4252	0.06558
7.01913	0.05534	8.55758	0.05145	10.4488	0.06582
7.02459	0.05554	8.58636	0.05164	10.474	0.06606
7.03169	0.05574	8.61439	0.05181	10.5	0.06627
7.04098	0.05593	8.64167	0.05199	10.5268	0.06651
7.05191	0.05612	8.66894	0.05218	10.5528	0.06674
7.06393	0.05631	8.69621	0.05235	10.5795	0.06697
7.0776	0.0565	8.72348	0.05252	10.6071	0.06719
7.09235	0.05669	8.75	0.0527	10.6339	0.06742
7.10765	0.05689	8.77727	0.05289	10.6614	0.06766
7.12404	0.05708	8.80379	0.05307	10.6898	0.06789
7.14153	0.05728	8.83106	0.05326	10.7189	0.06813
7.16066	0.05748	8.85909	0.05344	11.0158	0.06836
7.18087	0.05768	8.88712	0.05362	11.0189	0.0686
7.39016	0.05788	8.91515	0.05381	11.0252	0.06883
7.3929	0.05807	8.94318	0.05398	11.0346	0.06906
7.39781	0.05826	8.97045	0.05415	11.0457	0.06928
7.40492	0.05845	8.99773	0.05434	11.0583	0.0695
7.41311	0.05864	9.025	0.05451	11.0724	0.06974
7.4235	0.05883	9.05227	0.05469	11.0882	0.06997
7.43497	0.05902	9.07879	0.05488	11.1055	0.0702
7.44754	0.05923	9.10606	0.05506	11.1252	0.07044
7.46175	0.05942	9.13258	0.05525	11.1465	0.07068
7.47705	0.05963	9.16061	0.05543	11.1693	0.07091
7.49453	0.05982	9.18864	0.05561	11.1929	0.07114
7.51257	0.06001	9.21742	0.05579	11.2173	0.07137
7.53115	0.06021	9.2447	0.05597	11.2425	0.0716
7.55027	0.0604	9.27197	0.05614	11.2677	0.07183
7.56994	0.06059	9.3	0.05633	11.2937	0.07205
7.59071	0.06078	9.32803	0.0565	11.3205	0.07228
7.61093	0.06097	9.3553	0.05668	11.3472	0.07251
7.81858	0.06117	9.38258	0.05687	11.374	0.07275
7.82131	0.06137	9.40985	0.05705	11.4024	0.07299
7.82678	0.06156	9.6947	0.05724	11.4315	0.07322
7.83443	0.06176	9.69773	0.05742	11.7291	0.07345
7.84426	0.06196	9.70303	0.0576	11.7315	0.07368
7.85574	0.06216	9.71136	0.05778	11.7378	0.07392
7.8694	0.06235	9.72121	0.05796	11.7457	0.07415
7.88415	0.06254	9.73258	0.05813	11.7559	0.07437
7.89891	0.06273	9.7447	0.05831	11.7685	0.07459
7.9153	0.06292	9.75833	0.05849	11.7811	0.07482
7.93224	0.06311	9.77273	0.05867	11.7961	0.07506
7.95027	0.06331	9.78939	0.05886	11.8126	0.07529
7.9694	0.06351	9.80682	0.05904	11.8315	0.07553
7.98907	0.06371	9.82576	0.05923	11.852	0.07576
8.19836	0.06391	9.84621	0.05941	11.8748	0.076
8.20109	0.06411	9.86742	0.05959	11.8984	0.07623
8.20656	0.06429	9.89015	0.05977	11.9228	0.07646
8.21366	0.06448	9.91212	0.05995	11.9472	0.07668
8.22186	0.06468	9.93485	0.06012	11.9724	0.07691
8.23224	0.06487	9.95758	0.06029	11.9984	0.07714
8.24426	0.06506	9.98106	0.06048	12.0236	0.07737
8.25738	0.06525	10.0045	0.06066	12.0504	0.0776
8.27158	0.06545	10.028	0.06085	12.0772	0.07784
8.28743	0.06565	10.053	0.06103	12.1055	0.07808
8.30546	0.06585	10.0788	0.06121	12.1347	0.07832
8.32404	0.06605	10.1045	0.0614	12.4394	0.07855
8.34426	0.06624	10.1303	0.06157	12.4425	0.07877
8.36448	0.06643	10.1561	0.06176	12.448	0.079
8.57268	0.06663	10.1818	0.06194	12.4567	0.07923
8.57486	0.06681	10.2083	0.06211	12.4669	0.07946
8.57923	0.067	10.2348	0.0623	12.4795	0.07968
8.58579	0.0672	10.2606	0.06247	12.4929	0.07991
8.59399	0.06739	10.2871	0.06265	12.5087	0.08015
8.60437	0.06759	10.3129	0.06284	12.526	0.08039
8.61694	0.06779	10.3401	0.06302	12.5457	0.08062
8.63115	0.06799	10.3682	0.0632	12.5669	0.08086
8.64699	0.06819	10.3962	0.06339	12.589	0.08109
8.66393	0.06838	10.6811	0.06357	12.6126	0.08132
8.68197	0.06857	10.6841	0.06374	12.6362	0.08155
8.7	0.06876	10.6894	0.06392	12.6606	0.08177
8.71912	0.06896	10.6962	0.0641	12.685	0.08199
8.7388	0.06914	10.7053	0.06429	12.7095	0.08223
8.75902	0.06933	10.7167	0.06446	12.7354	0.08246
8.77923	0.06953	10.7288	0.06464	12.7622	0.0827
8.98907	0.06973	10.7432	0.06483	12.789	0.08293
8.9918	0.06994	10.7599	0.06501	12.8173	0.08317
8.99781	0.07013	10.778	0.06521	12.8465	0.0834
9.00656	0.07032	10.7977	0.06538	12.8756	0.08363
9.01639	0.07052	10.8182	0.06555	13.1724	0.08386
9.02732	0.07071	10.8386	0.06573	13.1756	0.08409
9.04044	0.07091	10.8598	0.06592	13.1811	0.08432
9.0541	0.07109	10.8818	0.06609	13.1898	0.08454
9.0694	0.07128	10.9045	0.06627	13.1992	0.08477
9.08525	0.07148	10.9273	0.06645	13.211	0.08501
9.10164	0.07168	10.9508	0.06663	13.2252	0.08525
9.11967	0.07187	10.9758	0.06682	13.2417	0.08549
9.13934	0.07207	11.0015	0.067	13.2606	0.08571
9.15956	0.07227	11.0273	0.06718	13.2803	0.08595
9.37104	0.07247	11.0538	0.06737	13.3016	0.08618
9.37377	0.07266	11.0803	0.06755	13.3228	0.08641
9.37923	0.07285	11.1068	0.06772	13.3457	0.08663
9.38634	0.07304	11.1333	0.0679	13.3685	0.08686
9.39508	0.07323	11.1599	0.06808	13.3921	0.08709
9.40546	0.07343	11.1864	0.06825	13.4157	0.08732
9.41749	0.07362	11.2129	0.06844	13.4402	0.08756
9.43115	0.07381	11.2394	0.06862	13.4661	0.08779
9.44645	0.07401	11.2674	0.0688	13.4929	0.08802
9.46284	0.07421	11.2955	0.06899	13.5205	0.08826
9.48142	0.07442	11.3235	0.06917	13.5488	0.0885
9.50055	0.0746	11.6091	0.06936	13.5779	0.08872
9.52076	0.07479	11.6114	0.06953	13.6063	0.08895
9.54044	0.07499	11.6167	0.06971	13.6354	0.08918
9.74863	0.07518	11.6235	0.06989	13.6646	0.0894
9.75137	0.07537	11.6326	0.07007	13.6937	0.08963
9.75574	0.07556	11.6439	0.07024	13.7236	0.08986
9.76284	0.07576	11.6561	0.07043	14.0221	0.0901
9.77104	0.07596	11.6705	0.07062	14.0252	0.09034
9.78251	0.07616	11.6864	0.07081	14.0323	0.09057
9.79508	0.07635	11.7045	0.07098	14.0425	0.09082
9.80929	0.07655	11.7235	0.07116	14.0551	0.09103
9.82514	0.07674	11.7432	0.07135	14.0693	0.09126
9.84208	0.07694	11.7636	0.07153	14.0843	0.09149
9.85956	0.07713	11.7849	0.0717	14.1008	0.09172
9.87814	0.07732	11.8061	0.07188	14.1181	0.09195
9.89727	0.07751	11.828	0.07206	14.137	0.09217
9.91639	0.0777	11.8508	0.07223	14.1567	0.09241
9.93716	0.0779	11.8735	0.07242	14.1772	0.09265
10.1492	0.0781	11.897	0.0726	14.2	0.09288
10.1525	0.0783	11.9212	0.07278	14.2236	0.09312
10.1585	0.0785	11.947	0.07297	14.2488	0.09335
10.1667	0.07869	11.9727	0.07315	14.2748	0.09358
10.177	0.07888	11.9992	0.07334	14.3016	0.09381
10.1885	0.07908	12.025	0.07351	14.3284	0.09404
10.2016	0.07927	12.0508	0.07369	14.3559	0.09426
10.2158	0.07946	12.0773	0.07386	14.3827	0.09449
10.2306	0.07965	12.103	0.07405	14.4094	0.09472
10.2464	0.07984	12.1288	0.07422	14.437	0.09496
10.2634	0.08004	12.1553	0.07441	14.4654	0.09519
10.282	0.08024	12.1811	0.0746	14.4945	0.09543
10.3016	0.08044	12.2083	0.07478	14.7953	0.09566
10.5082	0.08063	12.2356	0.07497	14.7984	0.0959
10.5109	0.08083	12.2636	0.07514	14.8047	0.09612
10.5159	0.08102	12.2909	0.07531	14.8134	0.09635
10.5229	0.08122	12.3182	0.0755	14.8236	0.09658
10.5322	0.08141	12.3454	0.07568	14.8362	0.0968
10.5426	0.08159	12.3727	0.07585	14.8504	0.09704
10.5546	0.08179	12.4	0.07604	14.8653	0.09727
10.5678	0.08198	12.4273	0.07622	14.8819	0.09751
10.582	0.08218	12.4545	0.07641	14.9008	0.09774
10.5984	0.08238	12.7394	0.07659	14.9221	0.09798
10.6159	0.08258	12.7424	0.07676	14.9441	0.09821
10.635	0.08278	12.7477	0.07695	14.9669	0.09844
10.6552	0.08298	12.7553	0.07713	14.9906	0.09867
10.8667	0.08317	12.7652	0.07731	15.015	0.0989
10.8694	0.08335	12.7765	0.07749	15.0394	0.09912
10.8738	0.08355	12.7894	0.07766	15.0646	0.09935
10.8803	0.08374	12.803	0.07784	15.089	0.09958
10.8885	0.08393	12.8182	0.07803	15.115	0.09981
10.8989	0.08412	12.8348	0.07821	15.1409	0.10005
10.9109	0.08432	12.853	0.07838	15.1685	0.10028
10.9246	0.08452	12.872	0.07858	15.1968	0.10052
10.9399	0.08472	12.8924	0.07876	15.226	0.10076
10.9568	0.08492	12.9144	0.07894	15.5291	0.10099
10.9754	0.0851	12.9371	0.07912	15.5323	0.10121
10.994	0.0853	12.9606	0.0793	15.5378	0.10143
11.0126	0.08549	12.9841	0.07948	15.5449	0.10167
11.0328	0.08569	13.0083	0.07965	15.5551	0.1019
11.2393	0.08588	13.0333	0.07983	15.5669	0.10212
11.2415	0.08607	13.0568	0.08001	15.5803	0.10236
11.2459	0.08627	13.0818	0.0802	15.5961	0.1026
11.253	0.08647	13.1076	0.08039	15.6134	0.10283
11.2628	0.08666	13.1341	0.08057	15.6331	0.10307
11.2743	0.08686	13.1606	0.08074	15.6543	0.1033
11.2874	0.08706	13.1879	0.08093	15.6772	0.10352
11.3022	0.08725	13.2144	0.08111	15.6992	0.10375
11.318	0.08745	13.2409	0.08129	15.722	0.10399
11.3355	0.08763	13.2682	0.08147	15.7457	0.10421
11.3536	0.08782	13.2947	0.08164	15.7701	0.10444
11.3721	0.08802	13.3212	0.08182	15.7945	0.10467
11.3918	0.08821	13.3477	0.08201	15.8197	0.10491
11.5973	0.08841	13.3742	0.08219	15.8457	0.10514
11.6	0.0886	13.4008	0.08237	15.8732	0.10538
11.606	0.08881	13.4288	0.08256	15.9008	0.10561
11.6148	0.089	13.4561	0.08274	15.9299	0.10584
11.6251	0.0892	13.4841	0.08292	15.9583	0.10607
11.6377	0.08939	13.5121	0.0831	15.9874	0.1063
11.6514	0.08958	13.5402	0.08327	16.0165	0.10653
11.6661	0.08977	13.5674	0.08346	16.0457	0.10675
11.682	0.08996	13.5947	0.08363	16.0732	0.10698
11.6989	0.09015	13.622	0.08381	16.1024	0.10721
11.7164	0.09035	13.65	0.084	16.1315	0.10745
11.735	0.09055	13.678	0.08418	16.4299	0.10769
11.7557	0.09075	13.7061	0.08436	16.4339	0.10792
11.9716	0.09095	13.9939	0.08455	16.4402	0.10816
11.9749	0.09114	13.997	0.08473	16.4496	0.10839
11.9798	0.09133	14.003	0.0849	16.4606	0.10861
11.9874	0.09153	14.0099	0.08509	16.4732	0.10885
11.9967	0.09172	14.0197	0.08526	16.4882	0.10907
12.0082	0.09191	14.0311	0.08545	16.5039	0.1093
12.0202	0.0921	14.0439	0.08562	16.5213	0.10952
12.0339	0.09229	14.0583	0.0858	16.5394	0.10976
12.0486	0.09249	14.0742	0.08599	16.5591	0.11
12.065	0.09269	14.0917	0.08617	16.5811	0.11024
12.0831	0.09289	14.1106	0.08635	16.6039	0.11047
12.1022	0.09309	14.1303	0.08654	16.6276	0.1107
12.1224	0.09329	14.1515	0.08672	16.652	0.11093
12.3339	0.09348	14.1727	0.08689	16.6764	0.11117
12.3366	0.09367	14.1947	0.08708	16.7016	0.11139
12.3415	0.09386	14.2174	0.08725	16.7268	0.11161
12.3486	0.09405	14.2401	0.08742	16.7512	0.11184
12.3574	0.09424	14.2636	0.08761	16.7764	0.11207
12.3678	0.09443	14.2871	0.08779	16.8016	0.11231
12.3803	0.09463	14.3114	0.08798	16.8291	0.11254
12.3945	0.09483	14.3364	0.08816	16.8567	0.11278
12.4098	0.09503	14.3621	0.08834	16.8858	0.11302
12.4273	0.09523	14.3894	0.08853	17.1811	0.11325
12.4465	0.09542	14.4167	0.0887	17.1842	0.11347
12.4661	0.09561	14.4432	0.08888	17.1898	0.1137
12.4858	0.09581	14.4704	0.08907	17.1969	0.11393
12.6913	0.096	14.4977	0.08924	17.2063	0.11416
12.694	0.09619	14.525	0.08941	17.2181	0.11439
12.6989	0.09638	14.5508	0.0896	17.2315	0.11461
12.7055	0.09657	14.5773	0.08978	17.2472	0.11485
12.7148	0.09678	14.6038	0.08996	17.2646	0.11509
12.7268	0.09697	14.6318	0.09016	17.2843	0.11533
12.7404	0.09717	14.6599	0.09033	17.3055	0.11557
12.7557	0.09737	14.9462	0.09052	17.3276	0.11578
12.7721	0.09756	14.9485	0.09069	17.3504	0.11602
12.7902	0.09776	14.9538	0.09087	17.3732	0.11625
12.8087	0.09794	14.9606	0.09106	17.3961	0.11648
12.8279	0.09813	14.9697	0.09123	17.4205	0.1167
12.847	0.09832	14.9803	0.0914	17.4449	0.11693
12.8672	0.09852	14.9924	0.09159	17.4685	0.11716
13.0798	0.09872	15.0061	0.09177	17.4937	0.1174
13.0831	0.09891	15.022	0.09195	17.5197	0.11764
13.0885	0.09911	15.0394	0.09214	17.5472	0.11787
13.0967	0.09931	15.0583	0.09232	17.5748	0.11811
13.1076	0.09951	15.0788	0.09251	17.6031	0.11834
13.1202	0.0997	15.1	0.09269	17.6315	0.11857
13.1339	0.09989	15.1212	0.09286	17.6598	0.11879
13.1486	0.10008	15.1432	0.09305	17.6882	0.11902
13.1645	0.10028	15.1659	0.09322	17.7165	0.11925
13.1814	0.10046	15.1886	0.0934	17.7449	0.11948
13.1989	0.10066	15.2129	0.09358	17.7732	0.11971
13.2175	0.10086	15.2364	0.09376	17.8024	0.11995
13.2372	0.10106	15.2614	0.09394	18.1024	0.12019
13.4481	0.10126	15.2871	0.09413	18.1055	0.12042
13.4514	0.10145	15.3136	0.09432	18.1118	0.12065
13.4574	0.10165	15.3409	0.09448	18.1205	0.12088
13.465	0.10184	15.3689	0.09467	18.1307	0.12111
13.4749	0.10204	15.3955	0.09485	18.1425	0.12134
13.4863	0.10223	15.4227	0.09504	18.1567	0.12156
13.4989	0.10241	15.4508	0.09521	18.1716	0.12179
13.5131	0.10261	15.478	0.09538	18.1874	0.12202
13.5279	0.1028	15.5053	0.09557	18.2047	0.12226
13.5443	0.103	15.5326	0.09575	18.2244	0.1225
13.5623	0.1032	15.5614	0.09593	18.2449	0.12274
13.582	0.1034	15.8485	0.09612	18.2677	0.12296
13.7918	0.10359	15.8523	0.0963	18.2905	0.1232
13.7945	0.10379	15.8576	0.09649	18.3134	0.12343
13.8005	0.10398	15.8659	0.09667	18.3378	0.12366
13.8082	0.10417	15.8758	0.09684	18.3622	0.12388
13.8175	0.10436	15.8871	0.09701	18.3866	0.1241
13.829	0.10455	15.8992	0.0972	18.4102	0.12433
13.8415	0.10475	15.9129	0.09737	18.4354	0.12457
13.8552	0.10494	15.9288	0.09755	18.4614	0.1248
13.871	0.10514	15.9454	0.09774	18.4882	0.12504
13.888	0.10534	15.9644	0.09793	18.5158	0.12527
13.9066	0.10554	15.9841	0.09811	18.5441	0.12551
13.9268	0.10574	16.0045	0.09829	18.5724	0.12574
14.1393	0.10592	16.0265	0.09847	18.6016	0.12597
14.1415	0.10612	16.0485	0.09865	18.6299	0.12619
14.1464	0.10631	16.0712	0.09883	18.6583	0.12642
14.1535	0.1065	16.0947	0.099	18.6874	0.12665
14.1623	0.10669	16.1182	0.09919	18.7157	0.12688
14.1727	0.10688	16.1417	0.09936	18.7433	0.12711
14.1847	0.10708	16.1659	0.09956	18.7717	0.12735
14.1989	0.10728	16.1909	0.09974	18.8008	0.12759
14.2148	0.10748	16.2174	0.09992	19.1024	0.12782
14.2322	0.10768	16.2447	0.1001	19.1055	0.12806
14.2508	0.10787	16.272	0.10028	19.1118	0.12827
14.2705	0.10807	16.2985	0.10046	19.1189	0.12851
14.2913	0.10826	16.325	0.10064	19.1276	0.12874
14.5022	0.10845	16.3523	0.10082	19.1386	0.12897
14.5044	0.10864	16.378	0.10099	19.152	0.12919
14.5087	0.10883	16.4038	0.10118	19.1661	0.12942
14.5159	0.10903	16.4295	0.10135	19.1819	0.12966
14.5251	0.10922	16.4561	0.10153	19.1992	0.12989
14.5366	0.10942	16.4826	0.10172	19.2189	0.13013
14.5503	0.10962	16.5099	0.1019	19.2402	0.13037
14.5661	0.10982	16.5379	0.1021	19.2622	0.1306
14.5831	0.11001	16.825	0.10227	19.2858	0.13083
14.6011	0.1102	16.828	0.10245	19.3094	0.13106
14.6202	0.1104	16.8333	0.10263	19.3339	0.13128
14.6393	0.11059	16.8402	0.10281	19.3583	0.13151
14.6596	0.11078	16.8492	0.10298	19.3827	0.13174
14.865	0.11097	16.8606	0.10317	19.4071	0.13197
14.8672	0.11116	16.8735	0.10334	19.4323	0.13221
14.8721	0.11137	16.8879	0.10352	19.4591	0.13244
14.8798	0.11157	16.9038	0.10372	19.4866	0.13268
14.8896	0.11176	16.922	0.1039	19.515	0.13291
14.9016	0.11196	16.9417	0.10409	19.5433	0.13314
14.9159	0.11215	16.9621	0.10426	19.5717	0.13337
14.9312	0.11235	16.9826	0.10444	19.5992	0.1336
14.9475	0.11254	17.0045	0.10462	19.6276	0.13383
14.965	0.11273	17.0265	0.10479	19.6551	0.13405
14.9836	0.11292	17.0492	0.10497	19.6827	0.13428
15.0022	0.11311	17.0712	0.10516	19.7095	0.13452
15.0219	0.11331	17.0947	0.10534	19.737	0.13476
15.2279	0.1135	17.1182	0.10552	19.7654	0.135
15.2311	0.1137	17.1432	0.10571	19.7945	0.13523
15.2377	0.1139	17.1689	0.10589	19.8236	0.13546
15.2464	0.1141	17.1955	0.10606	19.8528	0.13569
15.2579	0.11429	17.2212	0.10625	19.8819	0.13592
15.271	0.11449	17.2477	0.10643	19.9102	0.13614
15.2852	0.11467	17.2742	0.10661	19.9386	0.13637
15.3	0.11487	17.3	0.10678	19.9669	0.13659
15.3164	0.11506	17.3258	0.10696	19.9937	0.13683
15.3333	0.11525	17.3523	0.10713	20.0221	0.13707
15.3514	0.11545	17.3788	0.10733	20.0512	0.1373
15.3705	0.11565	17.4061	0.10751	20.0803	0.13754
15.3913	0.11585	17.4333	0.1077	20.3779	0.13778
15.6082	0.11605	17.4621	0.10788	20.3819	0.13801
15.6115	0.11624	17.4901	0.10805	20.3882	0.13823
15.6169	0.11643	17.7758	0.10824	20.3969	0.13846
15.624	0.11662	17.778	0.10842	20.4071	0.13869
15.6333	0.11682	17.7833	0.10859	20.4189	0.13891
15.6448	0.117	17.7909	0.10877	20.4323	0.13914
15.6579	0.1172	17.7992	0.10895	20.4472	0.13937
15.6716	0.11739	17.8099	0.10914	20.463	0.13961
15.6869	0.11759	17.8227	0.10932	20.4811	0.13985
15.7044	0.11779	17.8379	0.1095	20.5008	0.14008
15.723	0.11799	17.8545	0.10969	20.5221	0.14032
15.7432	0.11818	17.8727	0.10987	20.5441	0.14054
15.9546	0.11838	17.8909	0.11004	20.5661	0.14077
15.9574	0.11857	17.9106	0.11023	20.5882	0.141
15.9634	0.11876	17.9311	0.1104	20.611	0.14123
15.971	0.11895	17.9523	0.11057	20.6347	0.14146
15.9803	0.11914	17.9735	0.11076	20.6575	0.14168
15.9913	0.11934	17.9947	0.11094	20.6811	0.14192
16.0044	0.11953	18.0167	0.11112	20.7055	0.14216
16.0191	0.11973	18.0394	0.11131	20.7307	0.14239
16.035	0.11993	18.0629	0.11149	20.7575	0.14262
16.053	0.12013	18.0871	0.11168	20.785	0.14286
16.0716	0.12033	18.1129	0.11186	20.8118	0.14309
16.0918	0.12052	18.1386	0.11203	20.8402	0.14333
16.2989	0.12071	18.1644	0.11222	20.8677	0.14355
16.3016	0.1209	18.1894	0.11239	20.8961	0.14377
16.3066	0.12109	18.2152	0.11257	20.9228	0.144
16.3137	0.12128	18.2409	0.11275	20.9504	0.14423
16.3224	0.12147	18.2674	0.11293	20.9772	0.14447
16.3328	0.12168	18.2932	0.11311	21.0055	0.1447
16.3448	0.12187	18.3197	0.1133	21.0339	0.14494
16.3596	0.12207	18.347	0.11348	21.063	0.14518
16.376	0.12227	18.375	0.11368	21.3614	0.14541
16.3934	0.12247	18.403	0.11384	21.3646	0.14563
16.412	0.12266	18.4311	0.11402	21.3701	0.14586
16.4311	0.12285	18.4583	0.11421	21.3772	0.1461
16.4514	0.12304	18.4856	0.11438	21.3858	0.14632
16.4716	0.12323	18.5129	0.11455	21.3969	0.14655
16.4918	0.12342	18.5402	0.11474	21.4094	0.14677
16.7011	0.12362	18.5674	0.11492	21.4228	0.14702
16.7044	0.12381	18.5947	0.1151	21.4386	0.14725
16.7104	0.12401	18.622	0.11529	21.4559	0.14749
16.7186	0.12421	18.9076	0.11547	21.4756	0.14772
16.7295	0.12441	18.9106	0.11566	21.4953	0.14795
16.7421	0.12461	18.9159	0.11583	21.5158	0.14818
16.7568	0.1248	18.9242	0.11601	21.5378	0.14841
16.7727	0.12498	18.9333	0.11618	21.5598	0.14863
16.7891	0.12518	18.9447	0.11637	21.5819	0.14885
16.806	0.12537	18.9568	0.11654	21.6039	0.14909
16.824	0.12556	18.9704	0.11673	21.626	0.14932
16.8432	0.12575	18.9856	0.11691	21.6496	0.14956
16.8634	0.12595	19.0023	0.11709	21.674	0.14979
17.0743	0.12615	19.0205	0.11728	21.6984	0.15003
17.0776	0.12635	19.0402	0.11746	21.7244	0.15027
17.0842	0.12656	19.0614	0.11765	21.7512	0.15049
17.0929	0.12674	19.0826	0.11782	21.7772	0.15072
17.1027	0.12693	19.1038	0.118	21.8024	0.15095
17.1142	0.12713	19.1258	0.11819	21.8284	0.15118
17.1273	0.12732	19.1485	0.11836	21.8535	0.1514
17.1421	0.12751	19.1704	0.11853	21.8795	0.15164
17.1574	0.1277	19.1932	0.11871	21.9047	0.15186
17.1743	0.1279	19.2167	0.11891	21.9307	0.1521
17.1918	0.1281	19.2417	0.11908	21.9575	0.15235
17.2115	0.1283	19.2667	0.11928	21.9858	0.15258
17.4219	0.12849	19.2932	0.11945	22.0142	0.15282
17.4251	0.12869	19.3197	0.11963	22.0433	0.15303
17.4306	0.12888	19.3454	0.11982	22.0717	0.15327
17.4383	0.12908	19.372	0.11999	22.0992	0.15349
17.4475	0.12926	19.3985	0.12016	22.1276	0.15372
17.4585	0.12945	19.4242	0.12034	22.1551	0.15395
17.4705	0.12965	19.4492	0.12052	22.1827	0.15418
17.4841	0.12984	19.4742	0.1207	22.2095	0.15442
17.4994	0.13004	19.5008	0.12089	22.2378	0.15466
17.5159	0.13024	19.5265	0.12107	22.2669	0.15489
17.5339	0.13044	19.5538	0.12126	22.5638	0.15512
17.5536	0.13063	19.5811	0.12144	22.5669	0.15535
17.7585	0.13083	19.6083	0.12162	22.5724	0.15558
17.7612	0.13102	19.6364	0.1218	22.5795	0.15582
17.7661	0.13121	19.6636	0.12198	22.5898	0.15604
17.7727	0.13141	19.6909	0.12215	22.6	0.15626
17.7814	0.13159	19.7182	0.12234	22.6118	0.1565
17.7913	0.13179	19.7447	0.12251	22.6252	0.15673
17.8027	0.13198	19.772	0.12269	22.641	0.15696
17.8159	0.13218	19.7992	0.12288	22.6575	0.1572
17.8312	0.13238	19.8265	0.12307	22.6756	0.15744
17.8481	0.13258	20.1106	0.12325	22.6953	0.15767
17.8667	0.13277	20.1136	0.12343	22.7157	0.1579
17.8863	0.13297	20.1197	0.1236	22.737	0.15812
17.9066	0.13316	20.1265	0.12379	22.7583	0.15836
18.1164	0.13335	20.1349	0.12397	22.7795	0.15858
18.1191	0.13354	20.1455	0.12414	22.8008	0.15881
18.124	0.13373	20.1583	0.12433	22.8228	0.15903
18.1312	0.13393	20.1712	0.1245	22.8441	0.15927
18.1399	0.13412	20.1864	0.12468	22.8661	0.15952
18.1514	0.13432	20.2023	0.12487	22.8906	0.15975
18.1639	0.13452	20.2204	0.12505	22.915	0.15999
18.1792	0.13472	20.2401	0.12524	22.941	0.16021
18.1956	0.13492	20.2599	0.12542	22.9654	0.16045
18.2142	0.13511	20.2811	0.1256	22.9905	0.16068
18.2339	0.1353	20.303	0.12579	23.0158	0.1609
18.2536	0.13549	20.3258	0.12595	23.0409	0.16112
18.2732	0.13568	20.3477	0.12613	23.0653	0.16135
18.4798	0.13587	20.3697	0.12632	23.089	0.16158
18.4825	0.13607	20.3924	0.12649	23.1142	0.16182
18.4874	0.13626	20.4159	0.12668	23.1402	0.16205
18.4945	0.13646	20.4401	0.12687	23.1669	0.16229
18.5038	0.13666	20.4659	0.12705	23.1937	0.16253
18.5159	0.13686	20.4917	0.12722	23.2213	0.16276
18.529	0.13706	20.5174	0.12741	23.2496	0.16298
18.5443	0.13724	20.5439	0.12758	23.2772	0.16321
18.5601	0.13744	20.5689	0.12777	23.3047	0.16345
18.577	0.13763	20.5947	0.12795	23.3315	0.16367
18.5945	0.13782	20.6205	0.12812	23.3591	0.1639
18.6131	0.13801	20.6455	0.12829	23.3858	0.16413
18.6322	0.1382	20.6712	0.12849	23.4126	0.16436
18.6519	0.13841	20.6962	0.12867	23.4394	0.1646
18.8606	0.1386	20.7227	0.12886	23.4669	0.16484
18.8645	0.1388	20.75	0.12904	23.4953	0.16508
18.8705	0.139	20.7773	0.12921	23.5228	0.1653
18.8787	0.1392	20.8038	0.1294	23.5512	0.16553
18.8891	0.13939	20.8303	0.12958	23.5772	0.16576
18.9011	0.13958	20.8568	0.12975	23.6039	0.16599
18.9148	0.13977	20.8841	0.12993	23.6299	0.16621
18.929	0.13996	20.9098	0.13011	23.6551	0.16644
18.9443	0.14015	20.9364	0.1303	23.6811	0.16667
18.9607	0.14034	20.9621	0.13048	23.7063	0.16691
18.9781	0.14055	20.9894	0.13065	23.7323	0.16715
18.9967	0.14075	21.0167	0.13085	23.759	0.16738
19.2016	0.14094	21.0439	0.13103	23.7866	0.16762
19.2049	0.14114	21.072	0.13122	23.8142	0.16785
19.2109	0.14133	21.1	0.13139	23.8417	0.16808
19.2186	0.14152	21.1273	0.13156	23.8685	0.1683
19.2273	0.14172	21.1545	0.13174	23.8953	0.16853
19.2383	0.14191	21.1818	0.13192	23.9213	0.16876
19.2503	0.1421	21.2083	0.1321	23.9472	0.16899
19.2634	0.14229	21.2341	0.13227	23.9724	0.16923
19.2776	0.14249	21.2606	0.13246	23.9984	0.16946
19.2934	0.14269	21.2871	0.13265	24.026	0.16969
19.3109	0.14289	21.3144	0.13284	24.0528	0.16993
19.3295	0.14309	21.3424	0.13302	24.0795	0.17016
19.3497	0.14328	21.6273	0.13319	24.1063	0.17039
19.3699	0.14347	21.6295	0.13338	24.1331	0.17062
19.5803	0.14367	21.6333	0.13355	24.1598	0.17085
19.5831	0.14386	21.6394	0.13373	24.1858	0.17107
19.5874	0.14404	21.6477	0.13391	24.2118	0.1713
19.5934	0.14424	21.6583	0.13409	24.2362	0.17153
19.6016	0.14443	21.6697	0.13427	24.2614	0.17177
19.6115	0.14463	21.6826	0.13446	24.2874	0.17201
19.6229	0.14483	21.6977	0.13464	24.315	0.17225
19.6372	0.14503	21.7152	0.13483	24.3417	0.17248
19.6525	0.14523	21.7326	0.13501	24.3693	0.1727
19.6694	0.14542	21.7515	0.13518	24.3961	0.17294
19.688	0.14561	21.7712	0.13537	24.4236	0.17317
19.7066	0.1458	21.7917	0.13554	24.4512	0.17339
19.7251	0.146	21.8129	0.13571	24.4779	0.17361
19.7443	0.14618	21.8333	0.1359	24.5039	0.17384
19.7639	0.14638	21.8538	0.13608	24.5291	0.17408
19.7842	0.14657	21.8758	0.13626	24.5543	0.17431
19.9896	0.14677	21.8977	0.13645	24.5811	0.17455
19.9923	0.14697	21.9212	0.13663	24.6079	0.17478
19.9989	0.14717	21.9455	0.13682	24.6354	0.17502
20.0077	0.14737	21.9704	0.137	24.663	0.17525
20.0186	0.14755	21.9947	0.13717	24.6906	0.17548
20.0306	0.14775	22.0197	0.13736	24.7173	0.1757
20.0437	0.14794	22.0447	0.13753	24.7441	0.17594
20.0579	0.14813	22.0705	0.13771	24.7701	0.17616
20.0732	0.14832	22.0947	0.13789	24.7953	0.17639
20.0896	0.14851	22.1189	0.13807	24.8205	0.17662
20.1071	0.14871	22.1439	0.13825	24.8457	0.17686
20.1251	0.14892	22.1689	0.13844	24.8716	0.1771
20.1454	0.14911	22.1947	0.13862	24.8984	0.17733
20.3557	0.14931	22.2212	0.13881	24.926	0.17758
20.3585	0.14951	22.2477	0.13899	24.9543	0.17779
20.3639	0.1497	22.2735	0.13916	24.9811	0.17802
20.3721	0.1499	22.2992	0.13935	25.0071	0.17825
20.3814	0.15008	22.3258	0.13952	25.0339	0.17848
20.3924	0.15027	22.3508	0.13969	25.0598	0.17871
20.4038	0.15046	22.3758	0.13987	25.085	0.17893
20.4175	0.15066	22.4	0.14006	25.111	0.17917
20.4322	0.15085	22.4258	0.14024	25.1362	0.17941
20.4481	0.15105	22.4523	0.14043	25.163	0.17965
20.4656	0.15126	22.4788	0.14061	25.1898	0.17988
20.4847	0.15145	22.5053	0.14079	25.2173	0.18011
20.5049	0.15165	22.5333	0.14097	25.2449	0.18034
20.5251	0.15183	22.5606	0.14115	25.2717	0.18057
20.7306	0.15203	22.5871	0.14132	25.2984	0.1808
20.7328	0.15222	22.6136	0.14151	25.3244	0.18102
20.7372	0.15241	22.6394	0.14168	25.3496	0.18125
20.7437	0.1526	22.6652	0.14186	25.3748	0.18148
20.7514	0.1528	22.6917	0.14205	25.4	0.18172
20.7617	0.153	22.7182	0.14223	25.426	0.18195
20.7732	0.15319	22.7447	0.14242	25.452	0.18219
20.7869	0.1534	22.7727	0.1426	25.4787	0.18243
20.8022	0.15359	22.8	0.14278	25.5055	0.18265
20.8186	0.15379	22.8273	0.14296	25.5323	0.18288
20.8361	0.15398	22.8545	0.14314	25.5583	0.18311
20.8541	0.15417	22.8803	0.14331	25.5835	0.18334
20.8727	0.15436	22.9068	0.1435	25.6087	0.18356
20.8918	0.15455	22.9326	0.14367	25.6331	0.18379
20.9115	0.15474	22.9583	0.14385	25.6575	0.18403
20.9311	0.15494	22.9841	0.14404	25.6819	0.18427
21.1393	0.15514	23.0099	0.14422	25.7079	0.18451
21.1421	0.15534	23.0364	0.14441	25.7346	0.18474
21.1475	0.15553	23.0629	0.14459	25.7606	0.18497
21.1557	0.15573	23.0894	0.14477	25.7874	0.1852
21.1661	0.15593	23.1159	0.14495	25.8126	0.18543
21.1781	0.15612	23.1424	0.14513	25.8386	0.18566
21.1907	0.1563	23.1689	0.1453	25.8638	0.18588
21.2044	0.1565	23.1955	0.14548	25.8882	0.18611
21.2191	0.15669	23.2212	0.14566	25.9118	0.18634
21.2339	0.15688	23.2462	0.14584	25.9354	0.18657
21.2503	0.15707	23.272	0.14603	25.9598	0.18681
21.2667	0.15728	23.2977	0.14621	25.9842	0.18704
21.2847	0.15748	23.3242	0.1464	26.0087	0.18728
21.3038	0.15768	23.3515	0.14658	26.0331	0.18752
21.5104	0.15787	23.3788	0.14676	26.0583	0.18774
21.5131	0.15806	23.4061	0.14694	26.0835	0.18797
21.5169	0.15826	23.4326	0.14712	26.1079	0.18819
21.5224	0.15845	23.4591	0.14729	26.1307	0.18842
21.53	0.15864	23.4849	0.14748	26.1543	0.18865
21.5393	0.15883	23.5099	0.14765	26.1772	0.18888
21.5497	0.15902	23.5348	0.14783	26.2008	0.18912
21.5612	0.15922	23.5606	0.14803	26.2244	0.18935
21.5749	0.15942	23.5871	0.14821	26.2488	0.18959
21.5907	0.15962	23.6144	0.1484	26.274	0.18983
21.6071	0.15982	23.6417	0.14857	26.3	0.19005
21.6251	0.16001	23.6682	0.14875	26.3252	0.19028
21.6437	0.1602	23.6947	0.14894	26.3488	0.19051
21.6634	0.1604	23.7212	0.14911	26.3732	0.19074
21.6825	0.16058	23.747	0.14928	26.3969	0.19097
21.7022	0.16077	23.7712	0.14945	26.4213	0.19121
21.7213	0.16097	23.7962	0.14964	26.4457	0.19143
21.741	0.16116	23.8205	0.14982	26.4701	0.19167
21.7612	0.16136	23.8454	0.15001	26.4945	0.1919
21.9716	0.16156	23.8712	0.15019	26.5197	0.19214
21.9743	0.16176	23.8962	0.15037	26.5457	0.19238
21.9803	0.16196	23.9227	0.15056	26.5717	0.1926
21.988	0.16215	23.9485	0.15073	26.5984	0.19284
21.9973	0.16234	23.9742	0.15091	26.6244	0.19306
22.0077	0.16254	23.9992	0.1511	26.6496	0.19328
22.0197	0.16273	24.0242	0.15127	26.674	0.19351
22.0333	0.16291	24.0485	0.15146	26.6976	0.19374
22.047	0.16311	24.0727	0.15163	26.7213	0.19398
22.0617	0.1633	24.097	0.15181	26.7457	0.19421
22.0781	0.1635	24.1212	0.152	26.7701	0.19445
22.0956	0.16371	24.147	0.15218	26.7953	0.19469
22.1137	0.1639	24.1727	0.15238	26.8205	0.19492
22.1339	0.1641	24.2	0.15255	26.8465	0.19515
22.1535	0.16429	24.2265	0.15272	26.8716	0.19537
22.3596	0.16449	24.2523	0.1529	26.8961	0.19561
22.3618	0.16467	24.278	0.15309	26.9205	0.19583
22.3661	0.16486	24.3038	0.15326	26.9449	0.19605
22.3721	0.16505	24.3288	0.15343	26.9677	0.19628
22.3792	0.16525	24.3538	0.15362	26.9905	0.19653
22.3885	0.16545	24.3788	0.15381	27.015	0.19677
22.3989	0.16564	24.4038	0.154	27.0402	0.197
22.4115	0.16585	24.4303	0.15417	27.0661	0.19723
22.4251	0.16605	24.4561	0.15435	27.0913	0.19746
22.4404	0.16624	24.4818	0.15454	27.1157	0.19769
22.4568	0.16643	24.5083	0.15472	27.1402	0.19792
22.4732	0.16662	24.5341	0.15489	27.1638	0.19815
22.4896	0.16681	24.5599	0.15507	27.1882	0.19837
22.5066	0.167	24.5848	0.15525	27.2118	0.1986
22.524	0.1672	24.6099	0.15543	27.2346	0.19883
22.5421	0.16739	24.6349	0.15561	27.2583	0.19907
22.5606	0.16758	24.6598	0.15579	27.2819	0.1993
22.5798	0.16779	24.6856	0.15599	27.3055	0.19954
22.6	0.16799	24.7114	0.15617	27.3307	0.19978
22.8137	0.16819	24.7379	0.15635	27.3559	0.20001
22.8164	0.16837	24.7644	0.15653	27.3819	0.20024
22.8208	0.16857	24.7909	0.1567	27.4071	0.20046
22.8262	0.16876	24.8159	0.15688	27.4315	0.20069
22.8333	0.16895	24.8409	0.15706	27.4551	0.20092
22.8421	0.16914	24.8659	0.15724	27.4787	0.20115
22.8514	0.16933	24.8894	0.15741	27.5016	0.20137
22.8618	0.16953	24.9136	0.15761	27.5252	0.20161
22.8732	0.16973	24.9379	0.15779	27.548	0.20185
22.8869	0.16993	24.9629	0.15798	27.5724	0.20208
22.9016	0.17012	24.9886	0.15816	27.5968	0.20233
22.9175	0.17032	25.0136	0.15833	27.6221	0.20254
22.9344	0.17052	25.0379	0.15852	27.6465	0.20278
22.9525	0.17071	25.0629	0.1587	27.6693	0.203
22.971	0.1709	25.0879	0.15887	27.6921	0.20324
22.9891	0.17108	25.1114	0.15905	27.715	0.20346
23.0071	0.17128	25.1349	0.15923	27.737	0.20369
23.0251	0.17147	25.1576	0.15941	27.7591	0.20393
23.0437	0.17167	25.1811	0.1596	27.7811	0.20416
23.0623	0.17187	25.2061	0.15978	27.8039	0.2044
23.082	0.17207	25.2311	0.15997	27.8276	0.20463
23.1022	0.17227	25.2568	0.16015	27.8504	0.20487
23.1224	0.17246	25.2826	0.16033	27.874	0.20509
23.1432	0.17265	25.3091	0.16051	27.8976	0.20533
23.1634	0.17285	25.3348	0.16068	27.922	0.20555
23.1831	0.17304	25.3599	0.16086	27.9449	0.20577
23.2033	0.17322	25.3849	0.16103	27.9669	0.206
23.2235	0.17342	25.4091	0.16122	27.989	0.20624
23.2432	0.17361	25.4341	0.16139	28.011	0.20647
23.2628	0.17382	25.4583	0.16158	28.0339	0.2067
23.471	0.17401	25.4833	0.16177	28.0567	0.20695
23.4738	0.17422	25.5091	0.16195	28.0803	0.20718
23.4792	0.17441	25.5348	0.16214	28.1047	0.20741
23.4863	0.1746	25.5614	0.16231	28.1291	0.20764
23.4945	0.1748	25.5864	0.1625	28.1528	0.20787
23.5038	0.17499	25.6114	0.16267	28.1764	0.2081
23.5142	0.17517	25.6356	0.16285	28.2	0.20832
23.5257	0.17536	25.6598	0.16302	28.2228	0.20855
23.5372	0.17556	25.6833	0.16321	28.2441	0.20878
23.5497	0.17575	25.7061	0.16339	28.2661	0.20902
23.5634	0.17595	25.7295	0.16358	28.2898	0.20927
23.5781	0.17615	25.7538	0.16376	28.3142	0.2095
23.5945	0.17635	25.778	0.16394	28.3402	0.20972
23.612	0.17655	25.8023	0.16412	28.3646	0.20995
23.6301	0.17674	25.8273	0.1643	28.3882	0.21018
23.6486	0.17693	25.8515	0.16448	28.4118	0.21041
23.6667	0.17712	25.8758	0.16466	28.4347	0.21064
23.6847	0.17732	25.8992	0.16483	28.4567	0.21086
23.7033	0.1775	25.922	0.16501	28.4787	0.21109
23.7213	0.1777	25.9447	0.1652	28.5	0.21133
23.7404	0.17789	25.9674	0.16538	28.5221	0.21157
23.7596	0.17809	25.9917	0.16557	28.5457	0.2118
23.7792	0.1783	26.0151	0.16575	28.5685	0.21204
23.9907	0.17849	26.0394	0.16593	28.5929	0.21227
23.9934	0.17869	26.0644	0.16611	28.6165	0.2125
23.9984	0.17888	26.0879	0.16629	28.641	0.21273
24.0044	0.17908	26.1114	0.16647	28.6646	0.21295
24.012	0.17927	26.1349	0.16665	28.6874	0.21318
24.0213	0.17945	26.1583	0.16682	28.7102	0.21341
24.0317	0.17965	26.1811	0.167	28.7323	0.21364
24.0426	0.17984	26.2038	0.16719	28.7551	0.21387
24.0546	0.18004	26.2258	0.16737	28.7772	0.21411
24.0678	0.18024	26.2492	0.16756	28.8	0.21435
24.0825	0.18043	26.2735	0.16774	28.8236	0.21459
24.0978	0.18063	26.2977	0.16792	28.8472	0.21481
24.1137	0.18083	26.3212	0.1681	28.8716	0.21504
24.1301	0.18102	26.3447	0.16828	28.8937	0.21527
24.147	0.18121	26.3689	0.16846	28.9165	0.2155
24.1645	0.1814	26.3924	0.16864	28.9386	0.21573
24.1814	0.18159	26.4152	0.16881	28.9606	0.21596
24.1984	0.18178	26.4371	0.16899	28.9827	0.21619
24.2158	0.18198	26.4598	0.16918	29.0039	0.21642
24.2339	0.18218	26.4826	0.16936	29.026	0.21666
24.2525	0.18238	26.5053	0.16954	29.0488	0.21689
24.2716	0.18258	26.5295	0.16973	29.0717	0.21713
24.2913	0.18278	26.5538	0.16991	29.0953	0.21736
24.312	0.18297	26.578	0.17009	29.1181	0.21759
24.5191	0.18316	26.6015	0.17027	29.1402	0.21781
24.5213	0.18335	26.625	0.17044	29.1622	0.21804
24.5251	0.18354	26.6485	0.17063	29.1835	0.21826
24.5306	0.18373	26.672	0.1708	29.2032	0.21849
24.5372	0.18392	26.6947	0.17098	29.2236	0.21873
24.5448	0.18412	26.7174	0.17117	29.2441	0.21897
24.5546	0.18432	26.7401	0.17135	29.2654	0.2192
24.5661	0.18452	26.7636	0.17153	29.2866	0.21944
24.5792	0.18472	26.7879	0.17172	29.3087	0.21967
24.5929	0.18491	26.8129	0.1719	29.3299	0.2199
24.6076	0.18511	26.8371	0.17207	29.3512	0.22013
24.6229	0.1853	26.8606	0.17226	29.3724	0.22036
24.6388	0.18549	26.8841	0.17243	29.3929	0.22059
24.6546	0.18568	26.9068	0.17262	29.4134	0.22081
24.6699	0.18587	26.9303	0.17279	29.4331	0.22104
24.6852	0.18606	26.953	0.17297	29.4528	0.22128
24.7016	0.18626	26.9758	0.17316	29.4732	0.22152
24.7186	0.18646	26.9985	0.17334	29.4945	0.22176
24.7366	0.18666	27.0227	0.17352	29.5165	0.22199
24.7552	0.18686	27.0462	0.17371	29.5394	0.22221
24.7743	0.18706	27.0705	0.17389	29.5614	0.22245
24.7945	0.18724	27.0939	0.17406	29.5827	0.22267
24.8142	0.18743	27.1174	0.17425	29.6039	0.2229
24.8339	0.18763	27.1409	0.17442	29.6252	0.22313
24.8535	0.18782	27.1636	0.1746	29.6457	0.22336
24.8732	0.18801	27.1856	0.17478	29.6677	0.22359
24.8924	0.1882	27.2076	0.17496	29.689	0.22383
24.912	0.1884	27.2303	0.17515	29.7118	0.22406
24.9322	0.1886	27.2538	0.17533	29.7339	0.2243
25.141	0.1888	27.2773	0.17551	29.7567	0.22453
25.1443	0.18901	27.3015	0.1757	29.7795	0.22476
25.1497	0.18919	27.3258	0.17588	29.8024	0.22499
25.1563	0.18938	27.3492	0.17605	29.8244	0.22522
25.1639	0.18957	27.3727	0.17624	29.8457	0.22545
25.1727	0.18977	27.3955	0.17641	29.8669	0.22567
25.182	0.18996	27.4197	0.17659	29.8882	0.2259
25.1929	0.19015	27.4424	0.17677	29.9087	0.22613
25.2049	0.19034	27.4644	0.17695	29.9291	0.22637
25.2175	0.19054	27.4871	0.17715	29.9496	0.22661
25.2317	0.19075	27.5106	0.17733	29.9709	0.22684
25.2475	0.19094	27.5341	0.1775	29.9929	0.22709
25.2639	0.19114	27.5576	0.17769	30.0158	0.2273
25.2814	0.19133	27.5803	0.17787	30.0386	0.22754
25.2995	0.19153	27.603	0.17804	30.0606	0.22776
25.3169	0.19172	27.6258	0.17823	30.0827	0.22799
25.3344	0.1919	27.6477	0.1784	30.1039	0.22822
25.3519	0.1921	27.6689	0.17858	30.126	0.22845
25.3694	0.19229	27.6894	0.17876	30.1465	0.22868
25.3874	0.19249	27.7106	0.17894	30.1677	0.22892
25.406	0.19269	27.7318	0.17912	30.1898	0.22915
25.4257	0.19289	27.7538	0.17931	30.2118	0.22939
25.4459	0.19309	27.7758	0.17949	30.2339	0.22962
25.6546	0.19328	27.7992	0.17968	30.2575	0.22985
25.6568	0.19347	27.822	0.17986	30.2795	0.23009
25.6607	0.19366	27.8447	0.18003	30.3024	0.23031
25.6656	0.19386	27.8667	0.18022	30.3244	0.23053
25.6727	0.19404	27.8886	0.18039	30.3449	0.23076
25.6809	0.19424	27.9106	0.18057	30.3654	0.23099
25.6907	0.19443	27.9318	0.18075	30.3858	0.23123
25.7011	0.19463	27.953	0.18093	30.4071	0.23146
25.7131	0.19483	27.9742	0.18113	30.4283	0.2317
25.7268	0.19503	27.997	0.1813	30.4496	0.23193
25.741	0.19522	28.0197	0.18149	30.4717	0.23216
25.7568	0.19542	28.0432	0.18165	30.4937	0.23239
25.7721	0.19561	28.0651	0.18184	30.5158	0.23262
25.7885	0.19581	28.0864	0.18202	30.537	0.23286
25.8055	0.19599	28.1083	0.18219	30.5583	0.23308
25.8219	0.19618	28.1288	0.18238	30.5787	0.2333
25.8382	0.19637	28.1492	0.18255	30.5984	0.23353
25.8552	0.19657	28.1697	0.18275	30.6181	0.23377
25.8721	0.19677	28.1909	0.18293	30.6386	0.23401
25.8902	0.19696	28.2121	0.18311	30.6598	0.23425
25.9087	0.19717	28.2333	0.18329	30.6803	0.23448
25.9279	0.19737	28.2553	0.18347	30.7008	0.23471
25.9481	0.19756	28.2773	0.18366	30.7213	0.23494
25.9683	0.19775	28.2992	0.18384	30.7402	0.23517
25.988	0.19794	28.3212	0.18401	30.7591	0.23539
26.0071	0.19813	28.3424	0.18418	30.778	0.23562
26.0257	0.19832	28.3636	0.18437	30.7961	0.23585
26.0448	0.19851	28.3841	0.18455	30.8142	0.23609
26.0639	0.19871	28.4053	0.18474	30.8331	0.23632
26.0831	0.19891	28.4273	0.18491	30.8528	0.23655
26.1022	0.19911	28.4485	0.1851	30.8724	0.23679
26.1219	0.19931	28.4712	0.18529	30.8921	0.23702
26.1426	0.19951	28.4932	0.18546	30.9126	0.23726
26.3514	0.19969	28.5159	0.18564	30.9323	0.23748
26.3525	0.19989	28.5371	0.18582	30.952	0.23771
26.3552	0.20008	28.5583	0.186	30.9709	0.23794
26.3596	0.20027	28.5788	0.18617	30.9905	0.23817
26.365	0.20046	28.5992	0.18636	31.0087	0.23839
26.3716	0.20065	28.6189	0.18653	31.0276	0.23864
26.3798	0.20085	28.6386	0.18673	31.0472	0.23887
26.3896	0.20105	28.6591	0.18691	31.0685	0.2391
26.4005	0.20125	28.6803	0.18709	31.0898	0.23934
26.4131	0.20145	28.7015	0.18727	31.111	0.23957
26.4268	0.20164	28.7227	0.18745	31.1331	0.23979
26.441	0.20184	28.7432	0.18763	31.1528	0.24002
26.4557	0.20203	28.7644	0.18781	31.1724	0.24026
26.471	0.20222	28.7848	0.18799	31.1921	0.24049
26.4863	0.20241	28.8053	0.18816	31.2118	0.24071
26.5011	0.2026	28.825	0.18835	31.2315	0.24094
26.5169	0.20279	28.8447	0.18853	31.2504	0.24118
26.5333	0.20299	28.8644	0.18872	31.2693	0.24141
26.5503	0.20319	28.8841	0.1889	31.2898	0.24165
26.5689	0.20339	28.9045	0.18908	31.3102	0.24188
26.588	0.20359	28.9258	0.18927	31.3315	0.24211
26.6076	0.20378	28.947	0.18944	31.3528	0.24235
26.6268	0.20397	28.9689	0.18962	31.3732	0.24257
26.6459	0.20417	28.9894	0.1898	31.3937	0.2428
26.665	0.20436	29.0091	0.18998	31.4126	0.24302
26.6841	0.20455	29.028	0.19015	31.4315	0.24325
26.7027	0.20474	29.0477	0.19034	31.4496	0.24349
26.7213	0.20494	29.0682	0.19052	31.4685	0.24372
26.7404	0.20514	29.0879	0.1907	31.4874	0.24395
26.7606	0.20534	29.1083	0.19089	31.5063	0.2442
26.9683	0.20554	29.1295	0.19107	31.526	0.24443
26.9705	0.20573	29.1508	0.19126	31.5457	0.24466
26.9749	0.20592	29.1727	0.19143	31.5654	0.24489
26.9803	0.20612	29.1939	0.19161	31.5843	0.24512
26.9874	0.20631	29.2144	0.19179	31.6024	0.24534
26.9956	0.20649	29.2349	0.19197	31.6213	0.24557
27.0044	0.20669	29.2553	0.19214	31.6394	0.2458
27.0137	0.20688	29.275	0.19233	31.6575	0.24604
27.0235	0.20707	29.2947	0.19251	31.6764	0.24627
27.0344	0.20727	29.3144	0.19269	31.6969	0.24651
27.0465	0.20748	29.3348	0.19288	31.7165	0.24674
27.0596	0.20767	29.3553	0.19306	31.7378	0.24697
27.0743	0.20787	29.3758	0.19323	31.7575	0.2472
27.0896	0.20806	29.397	0.19342	31.7764	0.24743
27.106	0.20825	29.4174	0.1936	31.7953	0.24766
27.1219	0.20844	29.4371	0.19378	31.8142	0.24788
27.1372	0.20863	29.4568	0.19396	31.8323	0.24811
27.1535	0.20883	29.4765	0.19413	31.8496	0.24834
27.1694	0.20902	29.497	0.19432	31.8669	0.24858
27.1863	0.20922	29.5174	0.1945	31.885	0.24881
27.2033	0.20942	29.5379	0.19468	31.9039	0.24905
27.2219	0.20962	29.5583	0.19487	31.922	0.24928
27.2415	0.20982	29.5788	0.19505	31.9409	0.24952
27.2612	0.21001	29.6	0.19522	31.9598	0.24975
27.2814	0.2102	29.6212	0.19541	31.9779	0.24997
27.3	0.21039	29.6409	0.19559	31.9961	0.2502
27.3191	0.21058	29.6614	0.19576	32.0134	0.25043
27.3377	0.21077	29.6811	0.19594	32.0299	0.25066
27.3563	0.21097	29.7	0.19612	32.0472	0.25089
27.3749	0.21116	29.7182	0.19631	32.0646	0.25113
27.3929	0.21136	29.7379	0.19649	32.0819	0.25136
27.412	0.21156	29.7576	0.19668	32.1008	0.25159
27.4317	0.21175	29.7788	0.19686	32.1197	0.25184
27.4514	0.21195	29.7992	0.19704	32.1386	0.25205
27.471	0.21215	29.8197	0.19721	32.1583	0.25229
27.4913	0.21234	29.8394	0.1974	32.1764	0.25252
27.5104	0.21253	29.8591	0.19758	32.1953	0.25275
27.5295	0.21272	29.878	0.19775	32.2142	0.25297
27.5481	0.21291	29.8962	0.19793	32.2323	0.2532
27.5661	0.2131	29.9144	0.19811	32.2504	0.25344
27.5842	0.2133	29.9326	0.19829	32.2685	0.25367
27.6027	0.2135	29.9515	0.19848	32.2874	0.25391
27.6219	0.2137	29.9704	0.19866	32.3071	0.25415
27.6415	0.2139	29.9901	0.19885	32.3291	0.25438
27.6618	0.2141	30.0099	0.19903	32.3496	0.25461
27.682	0.21429	30.0295	0.1992	32.3701	0.25484
27.7022	0.21448	30.0492	0.19939	32.3898	0.25506
27.7219	0.21468	30.0682	0.19956	32.4087	0.25528
27.7415	0.21486	30.0864	0.19974	32.4268	0.25551
27.7612	0.21505	30.1053	0.19992	32.4441	0.25574
27.7803	0.21524	30.1235	0.2001	32.4622	0.25598
27.7989	0.21545	30.1417	0.20028	32.4803	0.25621
27.8186	0.21564	30.1598	0.20047	32.4976	0.25646
27.8388	0.21584	30.1788	0.20065	32.5165	0.25669
27.859	0.21604	30.1985	0.20085	32.5354	0.25692
27.8798	0.21623	30.2189	0.20101	32.5535	0.25715
27.8995	0.21643	30.2386	0.20119	32.5709	0.25738
27.9197	0.21662	30.2568	0.20137	32.5882	0.25761
27.9393	0.21681	30.275	0.20155	32.6055	0.25783
27.959	0.217	30.2932	0.20173	32.6228	0.25806
27.9781	0.21719	30.3114	0.20191	32.6386	0.25829
27.9973	0.21739	30.3288	0.20209	32.6551	0.25853
28.0164	0.21758	30.347	0.20227	32.6724	0.25877
28.0361	0.21778	30.3644	0.20246	32.6898	0.259
28.0557	0.21798	30.3826	0.20264	32.7071	0.25923
28.0754	0.21818	30.4008	0.20283	32.7244	0.25946
28.0956	0.21838	30.4189	0.20301	32.7409	0.25969
28.1158	0.21857	30.4364	0.20318	32.7583	0.25992
28.1355	0.21875	30.4545	0.20335	32.774	0.26015
28.1541	0.21895	30.472	0.20354	32.7898	0.26037
28.1727	0.21914	30.4886	0.20372	32.8047	0.2606
28.1913	0.21933	30.5061	0.2039	32.8197	0.26084
28.2104	0.21952	30.5227	0.20408	32.8346	0.26108
28.229	0.21972	30.5409	0.20426	32.8504	0.26131
28.2481	0.21992	30.5591	0.20445	32.8669	0.26154
28.2683	0.22012	30.5773	0.20463	32.8835	0.26178
28.2885	0.22033	30.597	0.20482	32.9016	0.26201
28.4973	0.22051	30.6159	0.20499	32.9189	0.26224
28.4989	0.22071	30.6341	0.20517	32.9362	0.26246
28.5016	0.2209	30.6523	0.20536	32.9535	0.2627
28.5066	0.22109	30.6697	0.20553	32.9701	0.26292
28.5131	0.22128	30.6864	0.2057	32.9874	0.26315
28.5208	0.22147	30.703	0.20588	33.0039	0.26338
28.5295	0.22167	30.7189	0.20608	33.0213	0.26362
28.5393	0.22187	30.7371	0.20626	33.0386	0.26386
28.5503	0.22207	30.7553	0.20645	33.0575	0.26409
28.5628	0.22226	30.7742	0.20662	33.0756	0.26433
28.5765	0.22246	30.7924	0.2068	33.0953	0.26455
28.5907	0.22265	30.8106	0.20699	33.1126	0.26478
28.6044	0.22285	30.8295	0.20716	33.1299	0.26501
28.6191	0.22303	30.8477	0.20735	33.1465	0.26524
28.6333	0.22322	30.8659	0.20752	33.163	0.26547
28.6475	0.22342	30.8833	0.20769	33.1795	0.2657
28.6623	0.22361	30.9008	0.20789	33.1953	0.26593
28.6781	0.22381	30.9182	0.20806	33.2118	0.26617
28.6945	0.224	30.9364	0.20824	33.2283	0.2664
28.7115	0.22421	30.9545	0.20843	33.2465	0.26664
28.729	0.22441	30.9735	0.20861	33.2638	0.26687
28.7475	0.22461	30.9917	0.20879	33.2819	0.2671
28.7667	0.22479	31.0106	0.20897	33.2992	0.26733
28.7858	0.22499	31.0288	0.20915	33.3173	0.26755
28.8038	0.22518	31.0462	0.20932	33.3331	0.26777
28.8224	0.22536	31.0636	0.20951	33.3488	0.26801
28.8399	0.22555	31.0811	0.20969	33.3646	0.26824
28.8574	0.22575	31.0985	0.20986	33.3803	0.26848
28.8749	0.22595	31.1159	0.21005	33.3969	0.26871
28.8934	0.22615	31.1333	0.21024	33.4142	0.26895
28.9126	0.22635	31.1515	0.21043	33.4307	0.26918
28.9317	0.22654	31.1704	0.2106	33.448	0.26942
28.9508	0.22673	31.1886	0.21077	33.4646	0.26964
28.9694	0.22693	31.2061	0.21096	33.4819	0.26987
28.988	0.22712	31.2235	0.21114	33.4992	0.2701
29.0066	0.22732	31.2409	0.21131	33.5157	0.27032
29.0246	0.2275	31.2583	0.2115	33.5315	0.27055
29.0415	0.2277	31.275	0.21167	33.5472	0.27079
29.059	0.22789	31.2917	0.21186	33.563	0.27103
29.0759	0.22809	31.3083	0.21204	33.5795	0.27126
29.0934	0.22829	31.3258	0.21223	33.5961	0.2715
29.1109	0.22849	31.3432	0.21241	33.6134	0.27173
29.129	0.22869	31.3614	0.21259	33.6307	0.27196
29.1475	0.22888	31.3788	0.21277	33.6472	0.27219
29.1661	0.22907	31.3962	0.21295	33.663	0.27241
29.1847	0.22926	31.4136	0.21313	33.6787	0.27264
29.2027	0.22945	31.4303	0.2133	33.6945	0.27287
29.2202	0.22964	31.4455	0.21349	33.7094	0.2731
29.2377	0.22984	31.4606	0.21367	33.7244	0.27334
29.2557	0.23003	31.4765	0.21384	33.7402	0.27357
29.2738	0.23023	31.4932	0.21403	33.7567	0.2738
29.2923	0.23043	31.5099	0.21422	33.7724	0.27404
29.3109	0.23064	31.5265	0.21439	33.789	0.27427
29.33	0.23083	31.5439	0.21458	33.8055	0.2745
29.3497	0.23101	31.5606	0.21475	33.822	0.27472
29.3678	0.23121	31.5757	0.21494	33.8378	0.27495
29.3863	0.2314	31.5917	0.21512	33.852	0.27518
29.4044	0.23159	31.6083	0.21529	33.8661	0.27541
29.4219	0.23178	31.6235	0.21546	33.8787	0.27564
29.4393	0.23198	31.6386	0.21566	33.8921	0.27588
29.4568	0.23218	31.6538	0.21584	33.9055	0.27611
29.4743	0.23238	31.6704	0.21603	33.9205	0.27635
29.4929	0.23257	31.6864	0.21621	33.9346	0.2766
29.5115	0.23277	31.7038	0.21638	33.9504	0.27681
29.53	0.23296	31.7197	0.21657	33.9654	0.27704
29.5486	0.23316	31.7356	0.21675	33.9795	0.27727
29.5667	0.23335	31.7515	0.21692	33.9937	0.2775
29.5847	0.23354	31.7667	0.2171	34.0087	0.27773
29.6022	0.23373	31.7818	0.21728	34.0228	0.27796
29.6191	0.23392	31.7962	0.21747	34.037	0.27819
29.6361	0.23412	31.8106	0.21765	34.0512	0.27843
29.6535	0.23432	31.825	0.21783	34.0661	0.27867
29.6716	0.23451	31.8417	0.21802	34.0819	0.2789
29.6902	0.23472	31.8591	0.2182	34.0984	0.27913
29.7093	0.23491	31.8758	0.21839	34.1142	0.27936
29.7284	0.2351	31.8932	0.21856	34.1291	0.2796
29.7464	0.23529	31.9098	0.21874	34.1449	0.27982
29.7639	0.23549	31.9265	0.21891	34.1591	0.28004
29.782	0.23568	31.9424	0.21909	34.1732	0.28027
29.7989	0.23587	31.9583	0.21927	34.1858	0.2805
29.8153	0.23606	31.9735	0.21945	34.1992	0.28074
29.8322	0.23626	31.9886	0.21964	34.2142	0.28097
29.8492	0.23646	32.0038	0.21982	34.2291	0.28121
29.8678	0.23666	32.0204	0.22001	34.2441	0.28144
29.8869	0.23686	32.0364	0.22019	34.2606	0.28168
29.9055	0.23705	32.053	0.22036	34.2764	0.28191
29.924	0.23724	32.0697	0.22055	34.2921	0.28214
29.9421	0.23744	32.0849	0.22072	34.3079	0.28237
29.9596	0.23763	32.1	0.2209	34.3236	0.28259
29.977	0.23782	32.1151	0.22109	34.3386	0.28282
29.994	0.23801	32.1295	0.22126	34.3528	0.28305
30.0104	0.2382	32.1447	0.22144	34.3669	0.28329
30.0273	0.2384	32.1591	0.22163	34.3819	0.28352
30.0443	0.2386	32.175	0.22181	34.3969	0.28376
30.0617	0.2388	32.1909	0.222	34.4126	0.28399
30.0792	0.23899	32.2076	0.22218	34.4276	0.28422
30.0978	0.23919	32.2242	0.22235	34.4425	0.28445
30.1158	0.23939	32.2409	0.22254	34.4575	0.28468
30.1339	0.23957	32.2576	0.22271	34.4716	0.28491
30.1514	0.23977	32.2742	0.22289	34.4858	0.28513
30.1683	0.23996	32.2894	0.22307	34.5	0.28536
30.1858	0.24015	32.3053	0.22325	34.5126	0.28559
30.2027	0.24034	32.3205	0.22343	34.5268	0.28583
30.2202	0.24054	32.3364	0.22362	34.541	0.28606
30.2377	0.24074	32.353	0.2238	34.5551	0.2863
30.2557	0.24094	32.3697	0.22399	34.5693	0.28653
30.2743	0.24115	32.3871	0.22417	34.5835	0.28677
30.2934	0.24132	32.4045	0.22434	34.5984	0.287
30.312	0.24152	32.4212	0.22453	34.6126	0.28722
30.3295	0.24171	32.4371	0.22471	34.626	0.28745
30.3465	0.2419	32.4523	0.22488	34.6386	0.28768
30.3634	0.24209	32.4674	0.22506	34.6512	0.28791
30.3798	0.24229	32.4818	0.22524	34.6646	0.28814
30.3962	0.24248	32.4954	0.22542	34.678	0.28837
30.4131	0.24268	32.5099	0.22561	34.6913	0.28861
30.4301	0.24288	32.5258	0.22579	34.7055	0.28885
30.447	0.24308	32.5409	0.22598	34.7197	0.28909
30.465	0.24327	32.5561	0.22615	34.7347	0.2893
30.4825	0.24347	32.5712	0.22633	34.7488	0.28954
30.4994	0.24367	32.5856	0.2265	34.7614	0.28977
30.5164	0.24385	32.5992	0.22669	34.7748	0.29
30.5333	0.24404	32.6129	0.22686	34.7882	0.29022
30.5492	0.24423	32.6258	0.22704	34.8016	0.29045
30.565	0.24443	32.6394	0.22723	34.8142	0.29069
30.5809	0.24463	32.6538	0.22741	34.8276	0.29092
30.5967	0.24482	32.6682	0.2276	34.8417	0.29116
30.6137	0.24503	32.6826	0.22778	34.8567	0.29139
30.6306	0.24522	32.697	0.22796	34.8709	0.29162
30.6481	0.24541	32.7121	0.22815	34.885	0.29186
30.665	0.24561	32.728	0.22832	34.8992	0.29208
30.682	0.2458	32.7432	0.22849	34.9134	0.29231
30.6989	0.246	32.7568	0.22868	34.926	0.29253
30.7164	0.24618	32.7704	0.22886	34.937	0.29276
30.7333	0.24637	32.7841	0.22903	34.9488	0.293
30.7508	0.24657	32.7977	0.22922	34.9598	0.29323
30.7678	0.24677	32.8114	0.2294	34.9724	0.29346
30.7852	0.24697	32.8258	0.22959	34.9843	0.2937
30.8033	0.24717	32.8409	0.22977	34.9961	0.29394
30.8219	0.24736	32.8561	0.22995	35.0087	0.29417
30.8393	0.24755	32.872	0.23014	35.0205	0.2944
30.8563	0.24775	32.8886	0.23031	35.0323	0.29463
30.8727	0.24794	32.9045	0.23049	35.0433	0.29486
30.8885	0.24813	32.9197	0.23067	35.0551	0.29508
30.9044	0.24832	32.9341	0.23085	35.0661	0.2953
30.9197	0.24851	32.9492	0.23102	35.0772	0.29555
30.935	0.24871	32.9629	0.23121	35.0882	0.29578
30.9503	0.24891	32.978	0.23139	35.1	0.29602
30.9661	0.2491	32.9932	0.23158	35.1134	0.29626
30.982	0.2493	33.0083	0.23176	35.1268	0.29648
30.9984	0.2495	33.0235	0.23194	35.1394	0.29671
31.0147	0.2497	33.0386	0.23213	35.152	0.29694
31.0317	0.24989	33.0545	0.2323	35.1646	0.29717
31.0481	0.25007	33.0689	0.23247	35.1764	0.2974
31.0645	0.25027	33.0833	0.23266	35.1874	0.29762
31.0798	0.25046	33.097	0.23283	35.1984	0.29785
31.0956	0.25065	33.1106	0.23301	35.2087	0.29809
31.1109	0.25085	33.1242	0.2332	35.2197	0.29832
31.1268	0.25105	33.1386	0.23338	35.2315	0.29856
31.1432	0.25125	33.153	0.23358	35.2425	0.29879
31.1601	0.25145	33.1674	0.23375	35.2551	0.29903
31.1771	0.25164	33.1818	0.23393	35.2669	0.29926
31.1951	0.25183	33.197	0.23411	35.2795	0.29948
31.2115	0.25202	33.2106	0.23429	35.2913	0.29971
31.2279	0.25222	33.225	0.23447	35.3024	0.29994
31.2443	0.25241	33.2386	0.23465	35.3142	0.30017
31.2601	0.2526	33.2515	0.23482	35.3268	0.3004
31.2754	0.25279	33.2644	0.23501	35.3386	0.30063
31.2907	0.25299	33.2773	0.2352	35.3512	0.30087
31.3066	0.25319	33.2909	0.23538	35.3638	0.3011
31.3224	0.25339	33.3053	0.23557	35.3764	0.30135
31.3388	0.25359	33.3197	0.23574	35.3898	0.30157
31.3557	0.25378	33.3341	0.23592	35.4031	0.3018
31.3721	0.25398	33.3477	0.2361	35.4158	0.30203
31.3891	0.25417	33.3614	0.23628	35.4276	0.30226
31.4055	0.25435	33.375	0.23645	35.4402	0.30249
31.4213	0.25454	33.3879	0.23664	35.452	0.30271
31.4366	0.25474	33.4	0.23681	35.463	0.30294
31.4519	0.25493	33.4121	0.237	35.474	0.30318
31.4678	0.25513	33.425	0.23718	35.4858	0.30342
31.4836	0.25533	33.4386	0.23736	35.4984	0.30365
31.5	0.25553	33.4523	0.23754	35.5102	0.30389
31.5169	0.25573	33.4659	0.23773	35.5221	0.30411
31.5339	0.25592	33.4795	0.23791	35.5339	0.30435
31.5508	0.25611	33.4932	0.23808	35.5457	0.30457
31.5667	0.25631	33.5061	0.23827	35.5559	0.3048
31.5831	0.25649	33.5182	0.23844	35.5661	0.30502
31.5984	0.25668	33.5311	0.23863	35.5764	0.30525
31.6131	0.25687	33.5424	0.2388	35.5858	0.30549
31.6279	0.25708	33.5545	0.23898	35.5961	0.30573
31.6432	0.25728	33.5667	0.23918	35.6071	0.30597
31.659	0.25748	33.5795	0.23935	35.6181	0.3062
31.6754	0.25767	33.5932	0.23955	35.6307	0.30643
31.6918	0.25786	33.6068	0.23972	35.6425	0.30666
31.7082	0.25806	33.6204	0.2399	35.6543	0.30689
31.7235	0.25825	33.6333	0.24007	35.6661	0.30712
31.7393	0.25844	33.6462	0.24026	35.6772	0.30734
31.7546	0.25863	33.6591	0.24043	35.6882	0.30757
31.7694	0.25883	33.672	0.24061	35.6984	0.3078
31.7842	0.25902	33.6841	0.24079	35.7079	0.30804
31.7989	0.25922	33.6962	0.24097	35.7189	0.30828
31.8159	0.25942	33.7083	0.24117	35.7307	0.30852
31.8328	0.25961	33.7212	0.24135	35.7433	0.30875
31.8492	0.25981	33.7348	0.24153	35.7551	0.30897
31.8656	0.26001	33.7485	0.24171	35.7661	0.30921
31.882	0.2602	33.7621	0.24189	35.7764	0.30944
31.8989	0.26039	33.7758	0.24206	35.7866	0.30966
31.9148	0.26058	33.7886	0.24225	35.7968	0.30989
31.9301	0.26077	33.8015	0.24242	35.8055	0.31012
31.9454	0.26097	33.8144	0.2426	35.8142	0.31035
31.9601	0.26116	33.8265	0.24279	35.822	0.31058
31.9754	0.26136	33.8394	0.24296	35.8307	0.31082
31.9907	0.26156	33.853	0.24316	35.8394	0.31105
32.006	0.26175	33.8659	0.24334	35.8488	0.31129
32.0224	0.26196	33.8795	0.24351	35.8583	0.31153
32.0388	0.26214	33.8924	0.2437	35.8677	0.31175
32.0552	0.26234	33.9053	0.24388	35.8772	0.31197
32.071	0.26253	33.9174	0.24405	35.8858	0.31221
32.0863	0.26272	33.9303	0.24423	35.8945	0.31243
32.1016	0.26291	33.9417	0.24441	35.9031	0.31266
32.1169	0.2631	33.953	0.24458	35.9118	0.31289
32.1317	0.2633	33.9636	0.24478	35.9205	0.31313
32.147	0.2635	33.975	0.24496	35.9299	0.31337
32.1623	0.2637	33.9871	0.24515	35.9402	0.3136
32.1781	0.26389	33.9992	0.24533	35.9512	0.31384
32.1945	0.26409	34.0121	0.2455	35.9622	0.31406
32.2104	0.26428	34.0242	0.24569	35.9724	0.31429
32.2262	0.26448	34.0364	0.24586	35.9819	0.31452
32.2421	0.26467	34.0485	0.24604	35.9921	0.31475
32.2574	0.26485	34.0598	0.24622	36.0016	0.31498
32.2721	0.26505	34.0712	0.2464	36.011	0.31521
32.2869	0.26524	34.0826	0.24658	36.0205	0.31544
32.3022	0.26544	34.0947	0.24677	36.0299	0.31568
32.3175	0.26564	34.1068	0.24695	36.0402	0.31591
32.3333	0.26584	34.1189	0.24714	36.0504	0.31615
32.3497	0.26604	34.1318	0.24732	36.0606	0.31638
32.3661	0.26623	34.1447	0.2475	36.0709	0.31661
32.3825	0.26642	34.1576	0.24768	36.0811	0.31684
32.3984	0.26662	34.1705	0.24785	36.0906	0.31706
32.4137	0.26681	34.1826	0.24803	36.1	0.31729
32.429	0.267	34.1939	0.2482	36.1079	0.31752
32.4443	0.26719	34.2053	0.24839	36.1157	0.31775
32.4585	0.26738	34.2159	0.24857	36.1244	0.31799
32.4721	0.26758	34.2273	0.24876	36.1339	0.31823
32.4863	0.26778	34.2386	0.24894	36.1449	0.31846
32.5011	0.26798	34.2508	0.24912	36.1567	0.31869
32.5164	0.26818	34.2629	0.24931	36.1677	0.31893
32.5311	0.26837	34.2758	0.24948	36.178	0.31915
32.5459	0.26856	34.2879	0.24967	36.1882	0.31938
32.5596	0.26875	34.2992	0.24984	36.1984	0.31962
32.5738	0.26895	34.3106	0.25002	36.2079	0.31984
32.5869	0.26914	34.3212	0.25021	36.2165	0.32006
32.6	0.26933	34.3318	0.25038	36.2252	0.3203
32.6137	0.26952	34.3424	0.25056	36.2339	0.32054
32.6273	0.26973	34.353	0.25075	36.2433	0.32078
32.6415	0.26992	34.3636	0.25093	36.2528	0.32101
32.6563	0.27012	34.375	0.25111	36.263	0.32124
32.671	0.27032	34.3871	0.25129	36.2732	0.32147
32.6863	0.27052	34.3985	0.25147	36.2827	0.3217
32.7022	0.2707	34.4098	0.25165	36.2913	0.32193
32.718	0.27089	34.4212	0.25183	36.3	0.32215
32.7328	0.27109	34.4318	0.252	36.3071	0.32238
32.7481	0.27128	34.4424	0.25218	36.3142	0.32261
32.7623	0.27147	34.4523	0.25237	36.3205	0.32284
32.7771	0.27167	34.4629	0.25255	36.3276	0.32308
32.7918	0.27187	34.4735	0.25274	36.3354	0.32332
32.8071	0.27207	34.4849	0.25292	36.3433	0.32355
32.8235	0.27226	34.497	0.2531	36.352	0.32379
32.8399	0.27246	34.5091	0.25329	36.3614	0.32402
32.8568	0.27264	34.5204	0.25346	36.3709	0.32424
32.8721	0.27284	34.5318	0.25364	36.3795	0.32447
32.8874	0.27303	34.5424	0.25383	36.3874	0.3247
32.9022	0.27322	34.5538	0.254	36.3961	0.32493
32.9169	0.27342	34.5644	0.25417	36.4039	0.32515
32.9317	0.27361	34.5742	0.25436	36.411	0.32539
32.9459	0.27381	34.5849	0.25454	36.4189	0.32563
32.9607	0.27401	34.5962	0.25474	36.4276	0.32586
32.9754	0.2742	34.6083	0.25491	36.4362	0.3261
32.9907	0.2744	34.6197	0.25509	36.4457	0.32632
33.006	0.2746	34.6311	0.25527	36.4551	0.32655
33.0213	0.27479	34.6417	0.25545	36.463	0.32679
33.0361	0.27498	34.6523	0.25563	36.4709	0.32702
33.0514	0.27517	34.6621	0.25581	36.4787	0.32724
33.0656	0.27536	34.6712	0.25598	36.4866	0.32747
33.0792	0.27555	34.6803	0.25616	36.4937	0.3277
33.0929	0.27575	34.6894	0.25635	36.5016	0.32794
33.1071	0.27595	34.6992	0.25653	36.5095	0.32817
33.1219	0.27615	34.7091	0.25671	36.5173	0.3284
33.1366	0.27635	34.7197	0.2569	36.526	0.32864
33.1525	0.27655	34.7295	0.25708	36.5346	0.32887
33.1683	0.27674	34.7401	0.25727	36.5425	0.3291
33.1836	0.27693	34.7508	0.25744	36.5496	0.32933
33.1984	0.27712	34.7606	0.25762	36.5567	0.32955
33.2126	0.27731	34.7704	0.2578	36.5622	0.32978
33.2268	0.2775	34.7795	0.25798	36.5677	0.33001
33.2399	0.27769	34.7886	0.25815	36.5724	0.33025
33.253	0.27789	34.7985	0.25834	36.5787	0.33048
33.2661	0.27809	34.8076	0.25852	36.585	0.33072
33.2809	0.27829	34.8182	0.2587	36.5921	0.33095
33.2956	0.27849	34.8288	0.2589	36.5992	0.33118
33.3104	0.27868	34.8402	0.25907	36.6071	0.33141
33.3251	0.27887	34.8507	0.25924	36.6142	0.33164
33.3393	0.27907	34.8606	0.25943	36.6205	0.33188
33.3535	0.27926	34.8704	0.25961	36.6276	0.3321
33.3667	0.27945	34.8795	0.25979	36.6347	0.33233
33.3798	0.27964	34.8886	0.25997	36.6409	0.33256
33.3924	0.27983	34.897	0.26014	36.6472	0.3328
33.4055	0.28003	34.9061	0.26033	36.6543	0.33303
33.418	0.28023	34.9151	0.26052	36.6614	0.33327
33.4317	0.28043	34.925	0.26069	36.6693	0.3335
33.4448	0.28063	34.9356	0.26088	36.6772	0.33373
33.4585	0.28082	34.9455	0.26106	36.6842	0.33396
33.4721	0.28102	34.9561	0.26125	36.6913	0.33419
33.4863	0.2812	34.9667	0.26142	36.6976	0.33442
33.4995	0.2814	34.9773	0.26159	36.7047	0.33464
33.5126	0.28159	34.9871	0.26177	36.7102	0.33487
33.5246	0.28178	34.9962	0.26195	36.7157	0.3351
33.5366	0.28197	35.0053	0.26214	36.7213	0.33534
33.5492	0.28217	35.0144	0.26232	36.7276	0.33558
33.5623	0.28237	35.0242	0.2625	36.7354	0.33581
33.5754	0.28257	35.0341	0.26268	36.7433	0.33605
33.5896	0.28278	35.0439	0.26287	36.7512	0.33628
33.6038	0.28296	35.0538	0.26305	36.7598	0.33651
33.618	0.28315	35.0629	0.26322	36.7685	0.33673
33.6311	0.28334	35.072	0.26341	36.7772	0.33697
33.6448	0.28354	35.0811	0.26358	36.7843	0.33719
33.6574	0.28373	35.0894	0.26376	36.7921	0.33742
33.6699	0.28392	35.097	0.26394	36.7984	0.33765
33.6825	0.28412	35.1046	0.26413	36.8055	0.33788
33.6951	0.28431	35.1129	0.26432	36.8126	0.33812
33.7082	0.28452	35.122	0.2645	36.8205	0.33836
33.7219	0.28471	35.1311	0.26467	36.8284	0.3386
33.7355	0.28491	35.1409	0.26486	36.837	0.33881
33.7497	0.2851	35.15	0.26504	36.8441	0.33905
33.7639	0.2853	35.1583	0.26521	36.8504	0.33927
33.7781	0.28548	35.1674	0.2654	36.8567	0.33951
33.7918	0.28567	35.1758	0.26557	36.863	0.33973
33.8049	0.28587	35.1841	0.26575	36.8685	0.33996
33.818	0.28606	35.1917	0.26594	36.8724	0.34019
33.8312	0.28626	35.2	0.26612	36.8772	0.34043
33.8448	0.28646	35.2091	0.26629	36.8835	0.34067
33.8585	0.28666	35.2182	0.26649	36.8898	0.3409
33.8727	0.28686	35.228	0.26667	36.8969	0.34114
33.8869	0.28705	35.2371	0.26685	36.9039	0.34136
33.9016	0.28724	35.247	0.26703	36.911	0.34159
33.9158	0.28743	35.2553	0.2672	36.9181	0.34182
33.9295	0.28763	35.2636	0.26739	36.9244	0.34204
33.9432	0.28781	35.2704	0.26756	36.9291	0.34227
33.9557	0.288	35.278	0.26774	36.9339	0.3425
33.9678	0.2882	35.2856	0.26792	36.9394	0.34274
33.9798	0.2884	35.2932	0.2681	36.9457	0.34298
33.9929	0.2886	35.3015	0.2683	36.952	0.34322
34.0071	0.2888	35.3098	0.26848	36.9591	0.34345
34.0208	0.28899	35.3189	0.26866	36.9661	0.34368
34.0344	0.28919	35.3288	0.26884	36.9732	0.3439
34.0475	0.28938	35.3371	0.26902	36.9795	0.34414
34.0607	0.28957	35.3454	0.26919	36.985	0.34437
34.0738	0.28976	35.3538	0.26938	36.9905	0.34459
34.0863	0.28995	35.3614	0.26955	36.9961	0.34482
34.0989	0.29015	35.3689	0.26973	37.0008	0.34505
34.1109	0.29034	35.3758	0.26992	37.0047	0.34529
34.123	0.29054	35.3833	0.2701	37.0102	0.34553
34.1355	0.29074	35.3917	0.27028	37.0165	0.34576
34.1492	0.29093	35.4	0.27047	37.0228	0.34599
34.1623	0.29113	35.4083	0.27064	37.0284	0.34622
34.176	0.29133	35.4167	0.27083	37.0339	0.34646
34.1896	0.29152	35.425	0.27101	37.0386	0.34668
34.2033	0.29171	35.4326	0.27118	37.0433	0.3469
34.2164	0.2919	35.4402	0.27135	37.0472	0.34713
34.229	0.29209	35.447	0.27154	37.0504	0.34736
34.241	0.29228	35.453	0.27172	37.0528	0.3476
34.2535	0.29248	35.4599	0.27191	37.0567	0.34783
34.2656	0.29268	35.4667	0.27209	37.0606	0.34807
34.2781	0.29288	35.4742	0.27227	37.0661	0.3483
34.2907	0.29308	35.4826	0.27246	37.0709	0.34855
34.3038	0.29328	35.4909	0.27263	37.0764	0.34877
34.3175	0.29346	35.4985	0.27281	37.0811	0.34899
34.33	0.29366	35.5061	0.273	37.0842	0.34922
34.3421	0.29385	35.5136	0.27317	37.0874	0.34945
34.3541	0.29404	35.5212	0.27334	37.0906	0.34968
34.3656	0.29423	35.5288	0.27353	37.0937	0.34991
34.3765	0.29442	35.5348	0.27371	37.0961	0.35014
34.3869	0.29462	35.5409	0.2739	37.1	0.35038
34.3984	0.29482	35.5477	0.27408	37.1039	0.35062
34.4098	0.29502	35.5553	0.27426	37.1087	0.35086
34.4213	0.29522	35.5629	0.27445	37.1142	0.35108
34.4333	0.29541	35.5705	0.27462	37.1205	0.35131
34.4453	0.29561	35.5773	0.2748	37.1252	0.35154
34.4568	0.2958	35.5841	0.27498	37.1299	0.35177
34.4689	0.29599	35.5902	0.27516	37.1346	0.352
34.4798	0.29618	35.5962	0.27533	37.1394	0.35222
34.4913	0.29637	35.6015	0.27552	37.1433	0.35245
34.5022	0.29657	35.6068	0.2757	37.1472	0.35269
34.5137	0.29676	35.6129	0.27589	37.152	0.35293
34.5257	0.29696	35.6197	0.27607	37.1583	0.35316
34.5372	0.29716	35.6265	0.27625	37.1638	0.3534
34.5497	0.29736	35.6341	0.27644	37.1701	0.35363
34.5623	0.29755	35.6417	0.27661	37.1764	0.35386
34.5754	0.29775	35.6485	0.27679	37.1827	0.35409
34.588	0.29794	35.6553	0.27697	37.189	0.35431
34.6005	0.29813	35.6614	0.27715	37.1937	0.35454
34.6131	0.29832	35.6674	0.27732	37.1984	0.35477
34.6246	0.29851	35.6727	0.27751	37.2032	0.355
34.6355	0.29871	35.6788	0.27769	37.2087	0.35524
34.647	0.29891	35.6856	0.27787	37.2142	0.35548
34.659	0.29911	35.6924	0.27806	37.2205	0.35571
34.671	0.2993	35.6992	0.27825	37.2268	0.35594
34.6836	0.2995	35.7076	0.27843	37.2331	0.35617
34.6951	0.29969	35.7159	0.2786	37.2386	0.3564
34.7071	0.29989	35.7227	0.27878	37.2433	0.35663
34.7186	0.30008	35.7296	0.27896	37.2488	0.35685
34.73	0.30026	35.7364	0.27914	37.2527	0.35708
34.741	0.30046	35.7424	0.27931	37.2559	0.35731
34.7514	0.30065	35.7485	0.2795	37.2591	0.35755
34.7623	0.30085	35.7545	0.27968	37.263	0.35779
34.7732	0.30105	35.7614	0.27986	37.2677	0.35803
34.7852	0.30125	35.7682	0.28005	37.2724	0.35826
34.7978	0.30144	35.775	0.28023	37.2772	0.35848
34.8098	0.30164	35.7826	0.28042	37.2811	0.35872
34.8224	0.30184	35.7901	0.28059	37.2858	0.35895
34.8344	0.30202	35.797	0.28077	37.2898	0.35917
34.8459	0.30221	35.8038	0.28095	37.2937	0.35939
34.8568	0.3024	35.8098	0.28112	37.2961	0.35963
34.8678	0.3026	35.8152	0.2813	37.2992	0.35986
34.8781	0.30279	35.8205	0.28149	37.3016	0.36009
34.8891	0.30299	35.8258	0.28167	37.3047	0.36033
34.8995	0.30319	35.8326	0.28185	37.3079	0.36056
34.9115	0.30339	35.8394	0.28204	37.3126	0.36081
34.9235	0.30359	35.8462	0.28222	37.3173	0.36104
34.9361	0.30377	35.853	0.28241	37.322	0.36126
34.9481	0.30397	35.8606	0.28258	37.326	0.36149
34.9596	0.30416	35.8667	0.28276	37.3291	0.36172
34.9705	0.30435	35.8727	0.28293	37.3323	0.36194
34.9814	0.30454	35.878	0.28311	37.3354	0.36217
34.9918	0.30473	35.8833	0.28329	37.3378	0.3624
35.0022	0.30493	35.8879	0.28348	37.3402	0.36264
35.012	0.30513	35.8932	0.28366	37.3433	0.36288
35.023	0.30533	35.8985	0.28385	37.3472	0.36311
35.0339	0.30553	35.9053	0.28403	37.352	0.36336
35.0448	0.30572	35.9114	0.28421	37.3567	0.36357
35.0563	0.30592	35.9174	0.28438	37.3598	0.3638
35.0672	0.30611	35.9227	0.28457	37.363	0.36403
35.0781	0.3063	35.928	0.28475	37.3661	0.36427
35.088	0.30649	35.9326	0.28492	37.3693	0.36449
35.0978	0.30668	35.9371	0.2851	37.3717	0.36471
35.1066	0.30687	35.9409	0.28528	37.374	0.36495
35.1158	0.30707	35.9447	0.28546	37.3772	0.36519
35.1257	0.30727	35.9492	0.28565	37.3803	0.36542
35.1361	0.30747	35.9538	0.28583	37.3835	0.36566
35.147	0.30767	35.9591	0.28602	37.3866	0.36589
35.1585	0.30786	35.9652	0.2862	37.3905	0.36612
35.1699	0.30806	35.9712	0.28637	37.3937	0.36635
35.1809	0.30825	35.9765	0.28656	37.3969	0.36657
35.1912	0.30844	35.9818	0.28673	37.3992	0.36679
35.2011	0.30863	35.9864	0.28691	37.4008	0.36703
35.2109	0.30882	35.9909	0.28709	37.4024	0.36726
35.2202	0.30901	35.9954	0.28727	37.4039	0.3675
35.2295	0.30922	35.9992	0.28745	37.4071	0.36773
35.2388	0.30941	36.0038	0.28764	37.4102	0.36798
35.2492	0.30962	36.0083	0.28782	37.4142	0.3682
35.259	0.30981	36.0136	0.28802	37.4173	0.36843
35.2694	0.31	36.0197	0.28818	37.4197	0.36866
35.2787	0.3102	36.025	0.28836	37.422	0.3689
35.2874	0.31039	36.0295	0.28855	37.4244	0.36912
35.2967	0.31058	36.0341	0.28872	37.426	0.36935
35.3055	0.31077	36.0386	0.2889	37.4276	0.36957
35.3137	0.31096	36.0432	0.28908	37.4284	0.36981
35.3213	0.31115	36.047	0.28926	37.4291	0.37005
35.3295	0.31135	36.0515	0.28946	37.4315	0.37028
35.3383	0.31155	36.0568	0.28964	37.4346	0.37052
35.347	0.31175	36.0621	0.28981	37.4378	0.37075
35.3568	0.31195	36.0682	0.29	37.4409	0.37098
35.3667	0.31215	36.0742	0.29018	37.4441	0.37122
35.377	0.31234	36.0795	0.29035	37.4465	0.37144
35.3869	0.31252	36.0849	0.29054	37.4488	0.37166
35.3962	0.31272	36.0894	0.29071	37.4504	0.37189
35.4055	0.31291	36.0932	0.29089	37.4512	0.37212
35.4142	0.3131	36.0977	0.29107	37.452	0.37236
35.4235	0.3133	36.1015	0.29126	37.4535	0.37259
35.4328	0.31349	36.1061	0.29143	37.4567	0.37283
35.4426	0.3137	36.1106	0.29163	37.4606	0.37306
35.453	0.3139	36.1167	0.2918	37.4654	0.3733
35.4634	0.3141	36.122	0.29199	37.4693	0.37352
35.4743	0.31428	36.1273	0.29217	37.4732	0.37375
35.4841	0.31447	36.1318	0.29234	37.4756	0.37398
35.4929	0.31467	36.1364	0.29253	37.4779	0.37421
35.5022	0.31486	36.1401	0.2927	37.4803	0.37443
35.5109	0.31505	36.1439	0.29287	37.4827	0.37466
35.5197	0.31524	36.147	0.29305	37.4843	0.3749
35.5284	0.31544	36.1508	0.29325	37.4858	0.37514
35.5372	0.31564	36.1553	0.29343	37.489	0.37538
35.5465	0.31584	36.1606	0.29362	37.4929	0.37561
35.5568	0.31604	36.1659	0.29379	37.4976	0.37584
35.5672	0.31623	36.1712	0.29397	37.5016	0.37606
35.5776	0.31643	36.175	0.29416	37.5039	0.37629
35.5885	0.31661	36.1795	0.29433	37.5063	0.37652
35.5989	0.3168	36.1841	0.2945	37.5079	0.37675
35.6082	0.31699	36.1879	0.29469	37.5102	0.37698
35.6169	0.31719	36.1902	0.29486	37.5118	0.37721
35.6262	0.31738	36.1932	0.29506	37.5134	0.37745
35.6355	0.31758	36.197	0.29524	37.515	0.37768
35.6454	0.31778	36.2008	0.29542	37.5181	0.37792
35.6552	0.31798	36.2053	0.29561	37.5205	0.37815
35.6661	0.31818	36.2099	0.29579	37.5236	0.37838
35.6765	0.31837	36.2152	0.29596	37.526	0.37862
35.6869	0.31856	36.2197	0.29614	37.5284	0.37884
35.6967	0.31876	36.2235	0.29632	37.5307	0.37906
35.7066	0.31895	36.2273	0.29649	37.5315	0.37929
35.7158	0.31913	36.2311	0.29668	37.5323	0.37952
35.724	0.31932	36.2341	0.29686	37.5323	0.37976
35.7322	0.31952	36.2379	0.29703	37.5331	0.38
35.7399	0.31972	36.2409	0.29723	37.5346	0.38023
35.7481	0.31992	36.2454	0.29741	37.537	0.38046
35.7568	0.32012	36.25	0.2976	37.5386	0.3807
35.7661	0.32031	36.2553	0.29777	37.5402	0.38093
35.7743	0.32051	36.2599	0.29795	37.5417	0.38116
35.7831	0.3207	36.2636	0.29813	37.5425	0.38139
35.7918	0.3209	36.2667	0.29831	37.5441	0.38161
35.8	0.32108	36.2697	0.29848	37.5457	0.38184
35.8077	0.32127	36.2727	0.29867	37.5465	0.38207
35.8147	0.32146	36.275	0.29884	37.5465	0.38231
35.8219	0.32166	36.2773	0.29903	37.5472	0.38254
35.829	0.32186	36.2795	0.29922	37.5488	0.38278
35.8372	0.32206	36.2833	0.2994	37.5504	0.38301
35.8454	0.32226	36.2871	0.29959	37.552	0.38324
35.8546	0.32246	36.2909	0.29976	37.5528	0.38348
35.8639	0.32265	36.2947	0.29994	37.5543	0.3837
35.8727	0.32284	36.2977	0.30012	37.5551	0.38393
35.8814	0.32303	36.3008	0.3003	37.5559	0.38415
35.8891	0.32322	36.3038	0.30047	37.5551	0.38438
35.8967	0.32341	36.3053	0.30066	37.5543	0.38461
35.9044	0.32361	36.3068	0.30084	37.5543	0.38485
35.912	0.3238	36.3091	0.30102	37.5543	0.38508
35.9197	0.324	36.3114	0.30121	37.5543	0.38532
35.9279	0.3242	36.3144	0.30139	37.5551	0.38556
35.9366	0.32441	36.3174	0.30158	37.5559	0.38579
35.9453	0.32459	36.3212	0.30175	37.5583	0.38601
35.9546	0.32478	36.3242	0.30193	37.5591	0.38624
35.9623	0.32498	36.3265	0.30212	37.5598	0.38647
35.9699	0.32517	36.3288	0.30229	37.5598	0.3867
35.9776	0.32536	36.3318	0.30246	37.5606	0.38693
35.9847	0.32555	36.3341	0.30265	37.5598	0.38716
35.9907	0.32575	36.3356	0.30283	37.5598	0.38739
35.9973	0.32594	36.3371	0.30301	37.5598	0.38764
36.0044	0.32614	36.3402	0.3032	37.5614	0.38787
36.012	0.32634	36.3432	0.30338	37.563	0.38811
36.0202	0.32654	36.3477	0.30357	37.5654	0.38832
36.0279	0.32673	36.3507	0.30374	37.5661	0.38856
36.0361	0.32693	36.3546	0.30392	37.5661	0.38878
36.0432	0.32711	36.3583	0.30411	37.5661	0.38902
36.0503	0.3273	36.3614	0.30428	37.5654	0.38924
36.0563	0.32749	36.3644	0.30445	37.5654	0.38947
36.0617	0.32769	36.3674	0.30464	37.5638	0.38971
36.0678	0.32789	36.3697	0.30482	37.563	0.38994
36.0738	0.32809	36.3727	0.305	37.563	0.39018
36.0809	0.32829	36.3758	0.30519	37.5638	0.39041
36.0885	0.32848	36.3795	0.30537	37.5646	0.39065
36.0967	0.32868	36.3833	0.30556	37.5661	0.39088
36.1049	0.32887	36.3871	0.30573	37.5677	0.39111
36.1131	0.32907	36.3901	0.3059	37.5701	0.39133
36.1208	0.32926	36.3924	0.30608	37.5717	0.39155
36.1284	0.32945	36.3939	0.30627	37.5724	0.39179
36.1361	0.32964	36.3962	0.30644	37.5724	0.39202
36.1426	0.32983	36.3977	0.30662	37.5732	0.39225
36.1492	0.33003	36.3992	0.30681	37.574	0.39249
36.1563	0.33024	36.4008	0.30699	37.5748	0.39273
36.1639	0.33043	36.403	0.30718	37.5772	0.39296
36.1727	0.33063	36.4053	0.30737	37.5787	0.39319
36.1809	0.33082	36.4091	0.30753	37.5811	0.39342
36.1885	0.33101	36.4114	0.30772	37.5819	0.39365
36.1967	0.33121	36.4129	0.3079	37.5827	0.39388
36.2044	0.3314	36.4151	0.30807	37.5827	0.3941
36.212	0.33159	36.4174	0.30826	37.5819	0.39433
36.2186	0.33178	36.4189	0.30843	37.5811	0.39456
36.2257	0.33197	36.4205	0.30861	37.5795	0.3948
36.2328	0.33217	36.4227	0.3088	37.5795	0.39504
36.2404	0.33237	36.425	0.30898	37.5795	0.39528
36.2481	0.33257	36.4288	0.30917	37.5803	0.3955
36.2563	0.33277	36.4318	0.30935	37.5811	0.39574
36.265	0.33296	36.4356	0.30952	37.5811	0.39597
36.2738	0.33315	36.4394	0.30971	37.5811	0.3962
36.2814	0.33334	36.4424	0.30988	37.5811	0.39642
36.2885	0.33354	36.4447	0.31006	37.5803	0.39664
36.2956	0.33372	36.4455	0.31024	37.578	0.39687
36.3022	0.33392	36.447	0.31042	37.5764	0.39711
36.3087	0.33411	36.4485	0.3106	37.5748	0.39734
36.3158	0.33431	36.4508	0.31079	37.5732	0.39758
36.3224	0.33451	36.4538	0.31098	37.5732	0.39782
36.33	0.33471	36.4568	0.31116	37.5724	0.39805
36.3383	0.33492	36.4599	0.31134	37.5724	0.39828
36.3464	0.33509	36.4621	0.31151	37.5724	0.39851
36.3541	0.33529	36.4652	0.3117	37.5717	0.39873
36.3606	0.33548	36.4667	0.31188	37.5701	0.39896
36.3678	0.33567	36.4689	0.31205	37.5685	0.39919
36.3743	0.33586	36.4697	0.31223	37.5669	0.39942
36.3798	0.33605	36.4704	0.31241	37.5646	0.39965
36.3858	0.33626	36.4704	0.31259	37.563	0.39989
36.3912	0.33646	36.4712	0.31278	37.5622	0.40013
36.3984	0.33666	36.4727	0.31297	37.5622	0.40037
36.4055	0.33685	36.475	0.31315	37.563	0.4006
36.4131	0.33704	36.4773	0.31333	37.5638	0.40082
36.4208	0.33724	36.4788	0.31351	37.563	0.40105
36.4279	0.33743	36.4803	0.31369	37.5622	0.40128
36.435	0.33762	36.4811	0.31386	37.5606	0.40151
36.4415	0.33781	36.4818	0.31404	37.5598	0.40173
36.4475	0.338	36.4811	0.31421	37.5583	0.40196
36.453	0.3382	36.4803	0.3144	37.5559	0.4022
36.4585	0.3384	36.4795	0.31458	37.5543	0.40244
36.465	0.33859	36.4803	0.31477	37.5543	0.40267
36.4716	0.3388	36.4811	0.31495	37.5543	0.40291
36.4787	0.33899	36.4818	0.31515	37.5543	0.40314
36.4858	0.33919	36.4833	0.31532	37.5543	0.40337
36.4929	0.33938	36.4849	0.31549	37.5535	0.4036
36.4995	0.33957	36.4856	0.31568	37.5528	0.40382
36.506	0.33976	36.4856	0.31585	37.5504	0.40405
36.512	0.33995	36.4864	0.31603	37.548	0.40428
36.5175	0.34014	36.4871	0.3162	37.5449	0.40451
36.5224	0.34034	36.4871	0.31639	37.5425	0.40475
36.5273	0.34054	36.4879	0.31658	37.5409	0.40499
36.5333	0.34074	36.4894	0.31677	37.5402	0.40522
36.5399	0.34094	36.4917	0.31695	37.5402	0.40545
36.5459	0.34113	36.4939	0.31712	37.5394	0.40568
36.5519	0.34132	36.4962	0.3173	37.5394	0.40591
36.5574	0.34152	36.4977	0.31748	37.5386	0.40614
36.5628	0.34171	36.4985	0.31766	37.537	0.40637
36.5678	0.34189	36.4992	0.31784	37.5362	0.40659
36.5721	0.34209	36.5	0.31802	37.5346	0.40682
36.5759	0.34228	36.5008	0.31819	37.5323	0.40706
36.5803	0.34248	36.5015	0.31839	37.5307	0.4073
36.5852	0.34268	36.5038	0.31857	37.5299	0.40754
36.5902	0.34288	36.5061	0.31875	37.5299	0.40777
36.5962	0.34308	36.5091	0.31893	37.5299	0.408
36.6022	0.34328	36.5114	0.31911	37.5291	0.40823
36.6087	0.34347	36.5136	0.3193	37.5284	0.40846
36.6153	0.34365	36.5151	0.31947	37.5276	0.40869
36.6208	0.34385	36.5167	0.31964	37.526	0.40891
36.6257	0.34404	36.5174	0.31983	37.5236	0.40914
36.6311	0.34423	36.5174	0.32001	37.5213	0.40937
36.6355	0.34442	36.5174	0.32018	37.5197	0.40961
36.6404	0.34462	36.5174	0.32038	37.5173	0.40984
36.6448	0.34482	36.5182	0.32056	37.5165	0.41008
36.6503	0.34502	36.5189	0.32074	37.5157	0.41031
36.6563	0.34522	36.5204	0.32092	37.5157	0.41055
36.6628	0.34541	36.5212	0.3211	37.5157	0.41077
36.6699	0.3456	36.5227	0.32129	37.515	0.411
36.6754	0.3458	36.5235	0.32146	37.5134	0.41123
36.6814	0.34599	36.5235	0.32163	37.5118	0.41145
36.6874	0.34618	36.5235	0.32182	37.5102	0.41168
36.6929	0.34637	36.5227	0.32199	37.5079	0.41191
36.6978	0.34656	36.5212	0.32218	37.5063	0.41215
36.7027	0.34676	36.5204	0.32237	37.5047	0.41239
36.7087	0.34697	36.5204	0.32255	37.5039	0.41262
36.7153	0.34716	36.5212	0.32274	37.5039	0.41287
36.7224	0.34735	36.522	0.32291	37.5039	0.41308
36.729	0.34755	36.5227	0.32309	37.5031	0.41331
36.7355	0.34775	36.5227	0.32328	37.5008	0.41354
36.7421	0.34794	36.5235	0.32345	37.4992	0.41377
36.7486	0.34812	36.5235	0.32362	37.4969	0.414
36.7541	0.34831	36.5227	0.32381	37.4945	0.41422
36.759	0.3485	36.5212	0.32399	37.4921	0.41446
36.7634	0.3487	36.5204	0.32417	37.489	0.4147
36.7683	0.3489	36.5204	0.32436	37.4874	0.41493
36.7743	0.34911	36.5204	0.32454	37.4858	0.41517
36.7803	0.3493	36.5212	0.32473	37.485	0.4154
36.7869	0.3495	36.522	0.32491	37.485	0.41563
36.7929	0.34969	36.5235	0.32508	37.4835	0.41586
36.7989	0.34988	36.5242	0.32525	37.4827	0.41609
36.8044	0.35008	36.5242	0.32544	37.4819	0.41631
36.8093	0.35026	36.5242	0.32561	37.4795	0.41654
36.8142	0.35045	36.5235	0.3258	37.4772	0.41677
36.8186	0.35065	36.5227	0.32597	37.4748	0.41701
36.8224	0.35085	36.522	0.32615	37.4724	0.41724
36.8273	0.35105	36.5212	0.32635	37.4709	0.41748
36.8333	0.35125	36.5212	0.32653	37.4693	0.41772
36.8388	0.35144	36.522	0.32672	37.4685	0.41795
36.8448	0.35163	36.522	0.32689	37.4677	0.41817
36.8497	0.35183	36.522	0.32707	37.4661	0.4184
36.8546	0.35202	36.5212	0.32724	37.4638	0.41864
36.8596	0.35221	36.5204	0.32743	37.4614	0.41885
36.8634	0.3524	36.5197	0.3276	37.4583	0.41908
36.8661	0.35259	36.5182	0.32778	37.4543	0.41931
36.8689	0.35279	36.5167	0.32797	37.4504	0.41956
36.8716	0.35299	36.5151	0.32815	37.448	0.4198
36.8754	0.35319	36.5144	0.32834	37.4457	0.42003
36.8798	0.35338	36.5144	0.32852	37.4449	0.42026
36.8847	0.35359	36.5144	0.3287	37.4433	0.42049
36.8902	0.35378	36.5151	0.32888	37.4409	0.42072
36.8962	0.35397	36.5151	0.32906	37.4386	0.42095
36.9011	0.35416	36.5151	0.32923	37.4362	0.42117
36.9049	0.35435	36.5144	0.32941	37.4339	0.4214
36.9093	0.35454	36.5129	0.32959	37.4307	0.42163
36.9131	0.35473	36.5114	0.32977	37.4268	0.42186
36.9169	0.35492	36.5099	0.32996	37.4236	0.4221
36.9208	0.35513	36.5091	0.33014	37.4205	0.42233
36.9246	0.35533	36.5083	0.33033	37.4189	0.42257
36.9295	0.35553	36.5091	0.33051	37.4173	0.42281
36.935	0.35573	36.5091	0.33069	37.4165	0.42303
36.9404	0.35591	36.5091	0.33087	37.415	0.42326
36.9453	0.35611	36.5091	0.33105	37.4134	0.42349
36.9492	0.35629	36.5091	0.33122	37.411	0.42372
36.953	0.35649	36.5091	0.33141	37.4079	0.42394
36.9568	0.35668	36.5091	0.33158	37.4047	0.42418
36.9601	0.35687	36.5083	0.33176	37.4016	0.42441
36.9628	0.35707	36.5076	0.33195	37.3984	0.42465
36.9656	0.35727	36.5076	0.33213	37.3961	0.42488
36.9689	0.35747	36.5083	0.33233	37.3945	0.42512
36.9732	0.35766	36.5091	0.3325	37.3937	0.42536
36.977	0.35786	36.5106	0.33268	37.3929	0.42557
36.9809	0.35806	36.5114	0.33286	37.3913	0.42581
36.9852	0.35825	36.5114	0.33304	37.3898	0.42604
36.9891	0.35844	36.5114	0.33321	37.3874	0.42627
36.9929	0.35862	36.5106	0.33339	37.3858	0.42649
36.9956	0.35882	36.5091	0.33357	37.3835	0.42672
36.9984	0.35901	36.5068	0.33375	37.3811	0.42696
37.0011	0.35921	36.5053	0.33394	37.3787	0.4272
37.0049	0.35941	36.5038	0.33412	37.3772	0.42743
37.0093	0.35961	36.503	0.33431	37.3764	0.42766
37.0137	0.3598	36.503	0.33449	37.3756	0.4279
37.018	0.36	36.5023	0.33466	37.374	0.42812
37.0219	0.36019	36.5015	0.33485	37.3724	0.42835
37.0251	0.36039	36.5	0.33502	37.3709	0.42858
37.0284	0.36058	36.4977	0.3352	37.3677	0.4288
37.0322	0.36077	36.4954	0.33537	37.3646	0.42903
37.0344	0.36096	36.4932	0.33556	37.3614	0.42927
37.0372	0.36115	36.4901	0.33574	37.3583	0.4295
37.0393	0.36136	36.4879	0.33593	37.3551	0.42974
37.0426	0.36156	36.4864	0.33611	37.3528	0.42998
37.0464	0.36176	36.4864	0.33629	37.3512	0.43021
37.0514	0.36195	36.4856	0.33648	37.3496	0.43044
37.0557	0.36215	36.4856	0.33665	37.3472	0.43066
37.0601	0.36234	36.4841	0.33684	37.3449	0.4309
37.0645	0.36252	36.4826	0.33701	37.3425	0.43112
37.0683	0.36271	36.4803	0.33719	37.3394	0.43135
37.0716	0.3629	36.478	0.33736	37.3362	0.43157
37.0738	0.3631	36.4758	0.33755	37.3323	0.43181
37.0759	0.3633	36.4727	0.33773	37.3291	0.43205
37.0787	0.36349	36.4704	0.33792	37.3268	0.43229
37.082	0.36369	36.4682	0.3381	37.3252	0.43252
37.0863	0.36389	36.4659	0.33828	37.3236	0.43275
37.0902	0.36409	36.4644	0.33847	37.3205	0.43298
37.0945	0.36428	36.4629	0.33865	37.3181	0.43321
37.0989	0.36447	36.4614	0.33882	37.315	0.43344
37.1022	0.36466	36.4606	0.339	37.311	0.43366
37.1049	0.36485	36.4591	0.33918	37.3071	0.4339
37.1082	0.36504	36.4568	0.33935	37.3024	0.43412
37.1104	0.36524	36.4545	0.33954	37.2984	0.43436
37.1126	0.36543	36.4523	0.33972	37.2945	0.43459
37.1148	0.36564	36.4508	0.33991	37.2906	0.43483
37.1175	0.36584	36.4492	0.34009	37.2874	0.43507
37.1208	0.36604	36.4485	0.34027	37.285	0.4353
37.1246	0.36623	36.447	0.34046	37.2827	0.43553
37.129	0.36642	36.4447	0.34063	37.2803	0.43575
37.1317	0.36661	36.4424	0.34081	37.2772	0.43598
37.1344	0.3668	36.4402	0.34099	37.274	0.43621
37.1372	0.36699	36.4371	0.34117	37.2701	0.43644
37.1399	0.36718	36.4341	0.34134	37.2669	0.43667
37.1421	0.36738	36.4303	0.34153	37.263	0.4369
37.1443	0.36758	36.4273	0.34172	37.2591	0.43714
37.147	0.36778	36.425	0.34191	37.2567	0.43738
37.1503	0.36797	36.4227	0.34208	37.2535	0.43762
37.1536	0.36817	36.4212	0.34226	37.252	0.43784
37.1568	0.36837	36.4189	0.34245	37.2496	0.43807
37.1596	0.36856	36.4167	0.34263	37.2457	0.4383
37.1623	0.36875	36.4151	0.3428	37.2417	0.43853
37.165	0.36894	36.4129	0.34298	37.2378	0.43876
37.1667	0.36913	36.4098	0.34315	37.2339	0.43898
37.1678	0.36932	36.4068	0.34333	37.2291	0.43921
37.1688	0.36952	36.4038	0.34353	37.2252	0.43945
37.1699	0.36972	36.4015	0.3437	37.2205	0.43969
37.1727	0.36992	36.4	0.34388	37.2173	0.43992
37.1754	0.37012	36.3977	0.34407	37.2134	0.44016
37.1787	0.37031	36.3962	0.34425	37.211	0.44039
37.182	0.37051	36.3954	0.34443	37.2079	0.44062
37.1847	0.3707	36.3932	0.34461	37.2055	0.44084
37.1869	0.37089	36.3901	0.34479	37.2024	0.44107
37.1885	0.37108	36.3871	0.34497	37.1984	0.4413
37.1902	0.37127	36.3841	0.34515	37.1945	0.44153
37.1912	0.37146	36.3811	0.34532	37.1898	0.44176
37.1912	0.37166	36.378	0.34551	37.1866	0.442
37.1923	0.37186	36.375	0.3457	37.1835	0.44224
37.194	0.37206	36.3727	0.34589	37.1803	0.44247
37.1962	0.37226	36.372	0.34607	37.178	0.4427
37.1984	0.37245	36.3704	0.34624	37.1764	0.44293
37.2	0.37265	36.3689	0.34641	37.1732	0.44316
37.2011	0.37284	36.3667	0.3466	37.1701	0.44339
37.2022	0.37303	36.3644	0.34678	37.1669	0.44361
37.2027	0.37321	36.3629	0.34696	37.163	0.44384
37.2022	0.37341	36.3606	0.34713	37.1583	0.44407
37.2016	0.37361	36.3576	0.34731	37.1543	0.44431
37.2016	0.37381	36.3546	0.34751	37.1504	0.44455
37.2022	0.374	36.3523	0.34769	37.148	0.44479
37.2033	0.3742	36.3507	0.34786	37.1457	0.44501
37.2049	0.3744	36.3492	0.34805	37.1433	0.44525
37.2071	0.3746	36.3477	0.34823	37.1402	0.44548
37.2093	0.37478	36.3454	0.34842	37.1378	0.44571
37.2104	0.37497	36.3439	0.34859	37.1339	0.44594
37.2115	0.37517	36.3417	0.34876	37.1307	0.44615
37.212	0.37536	36.3379	0.34894	37.126	0.44639
37.2126	0.37555	36.3349	0.34912	37.1205	0.44662
37.2131	0.37574	36.3311	0.3493	37.1157	0.44685
37.2137	0.37594	36.3273	0.34949	37.111	0.44709
37.2142	0.37615	36.3242	0.34968	37.1071	0.44733
37.2158	0.37634	36.3227	0.34985	37.1039	0.44756
37.218	0.37655	36.3205	0.35004	37.1008	0.44779
37.2202	0.37673	36.3182	0.35022	37.0976	0.44802
37.2219	0.37692	36.3167	0.35039	37.0945	0.44824
37.2229	0.37711	36.3136	0.35058	37.0898	0.44848
37.2235	0.37731	36.3106	0.35075	37.085	0.4487
37.2246	0.3775	36.3076	0.35093	37.0803	0.44893
37.2251	0.37769	36.3038	0.35111	37.0756	0.44916
37.2251	0.37789	36.3	0.3513	37.0709	0.4494
37.2251	0.37809	36.297	0.35149	37.0661	0.44964
37.2257	0.37829	36.2947	0.35167	37.0622	0.44987
37.2268	0.37848	36.2932	0.35184	37.0583	0.45011
37.2279	0.37868	36.2909	0.35203	37.0551	0.45033
37.229	0.37887	36.2879	0.35221	37.0504	0.45056
37.2306	0.37907	36.2848	0.35238	37.0465	0.45079
37.2317	0.37925	36.2811	0.35257	37.0417	0.45102
37.2322	0.37944	36.2765	0.35274	37.0378	0.45125
37.2322	0.37964	36.2712	0.35292	37.0339	0.45148
37.2311	0.37983	36.2659	0.35311	37.0291	0.45171
37.2306	0.38003	36.2614	0.35329	37.0244	0.45195
37.2306	0.38023	36.2576	0.35348	37.0205	0.45218
37.2311	0.38043	36.2538	0.35365	37.0173	0.45242
37.2322	0.38062	36.2508	0.35384	37.0142	0.45265
37.2333	0.38082	36.2485	0.35402	37.011	0.45288
37.2344	0.38101	36.2462	0.3542	37.0079	0.45311
37.235	0.3812	36.2432	0.35437	37.0047	0.45333
37.235	0.3814	36.2401	0.35456	37.0008	0.45356
37.235	0.38158	36.2371	0.35473	36.9961	0.45379
37.2344	0.38177	36.2341	0.35491	36.9913	0.45402
37.2333	0.38197	36.2303	0.35509	36.9866	0.45426
37.2322	0.38217	36.2265	0.35528	36.9827	0.45449
37.2317	0.38237	36.2235	0.35547	36.9779	0.45473
37.2322	0.38257	36.2212	0.35565	36.9748	0.45497
37.2328	0.38276	36.2189	0.35583	36.9716	0.45519
37.2328	0.38296	36.2174	0.35601	36.9677	0.45542
37.2328	0.38315	36.2144	0.35619	36.9638	0.45565
37.2328	0.38334	36.2114	0.35636	36.9591	0.45588
37.2322	0.38353	36.2083	0.35655	36.9551	0.4561
37.2311	0.38372	36.2053	0.35672	36.9496	0.45633
37.229	0.38391	36.2015	0.3569	36.9441	0.45657
37.2268	0.38411	36.1977	0.35709	36.9386	0.45681
37.2251	0.38431	36.1947	0.35727	36.9339	0.45705
37.224	0.38451	36.1924	0.35745	36.9307	0.45728
37.2229	0.38471	36.1902	0.35764	36.9268	0.45751
37.2224	0.38491	36.1879	0.35781	36.9228	0.45774
37.2224	0.3851	36.1856	0.358	36.9181	0.45797
37.2219	0.38529	36.1833	0.35818	36.9126	0.4582
37.2202	0.38548	36.1803	0.35835	36.9079	0.45842
37.218	0.38567	36.1773	0.35852	36.9016	0.45865
37.2153	0.38586	36.1735	0.35871	36.8953	0.45888
37.212	0.38606	36.1697	0.35889	36.889	0.45912
37.2087	0.38625	36.1659	0.35908	36.8835	0.45935
37.206	0.38645	36.1621	0.35926	36.8779	0.45958
37.2038	0.38665	36.1591	0.35944	36.8724	0.45982
37.2022	0.38685	36.1568	0.35963	36.8677	0.46006
37.2005	0.38704	36.1545	0.35981	36.8638	0.46028
37.1989	0.38723	36.1515	0.35998	36.8598	0.46051
37.1967	0.38743	36.1485	0.36017	36.8551	0.46074
37.1945	0.38762	36.1447	0.36034	36.8496	0.46097
37.1918	0.38781	36.1417	0.36051	36.8441	0.4612
37.1885	0.388	36.1371	0.3607	36.8386	0.46142
37.1852	0.38819	36.1326	0.36088	36.8339	0.46166
[truncated: 10,121 more rows]
